1 **Characterization of *Plasmodium falciparum* RAP domain proteins-RAP291 and**  
2 **RAP070, and their association with ribosomal RNAs**

3 Asif Akhtar<sup>1\*</sup>, Arunaditya Deshmukh<sup>1\*</sup>, Ashutosh Panda<sup>1,2</sup>, Ekta Saini<sup>1</sup>, Rajan Pandey<sup>3</sup>, Iqbal  
4 Taliy Junaid<sup>1</sup>, Noah Machuki Onchieku<sup>1</sup>, Sadaf Parveen<sup>1</sup>, Suneet Shekhar Singh<sup>1</sup>, Dinesh  
5 Gupta<sup>3</sup>, Michael Theisen<sup>4,5</sup>, Asif Mohammed<sup>1</sup>, Pawan Malhotra<sup>1#</sup>

6 1. Malaria Group, International Centre for Genetic Engineering and Biotechnology (ICGEB),  
7 New Delhi, India

8 2. Department of Microbiology, All India Institute of Medical Sciences (AIIMS), New Delhi,  
9 India

10 3. Translational Bioinformatics, International Centre for Genetic Engineering and  
11 Biotechnology (ICGEB), New Delhi, India

12 4. Department for Congenital Disorders, Statens Serum Institut, Copenhagen, Denmark.

13 5. Centre for Medical Parasitology at Department of International Health, Immunology, and  
14 Microbiology, University of Copenhagen, Denmark

15

16 \*Equal authors

17

18 #Corresponding author: [pawanmal@gmail.com](mailto:pawanmal@gmail.com)

19

20 Running Title: RAP domain proteins on merozoite surface.

21

22 **Abstract**

23 *Plasmodium* genomes encode multiple RAP (RNA-binding domain abundant in  
24 Apicomplexan) domain proteins that contain a conserved module of 56 to 73 amino acids.  
25 Here, we characterized two of the *P. falciparum* RAP domain proteins; PfRAP291 &  
26 PfRAP070, for their expression and role at asexual blood stages. RNA binding assays and  
27 high-throughput CLIP-seq analysis showed that these proteins mainly bind ribosome  
28 associated RNAs. Blue-native PAGE and protein-protein interaction studies suggested  
29 association of these proteins with MSP-1 complex. Anti-PfRAP291 and anti-PfRAP070  
30 antibodies showed moderate inhibitions in *in-vitro* merozoite invasion assays. Together, these  
31 results suggest multiple roles of these proteins; PfRAP291 and PfRAP070, in merozoite  
32 invasion and in ribosome regulation during asexual stages of the parasite.

## 33 **Introduction**

34 The *Plasmodium* life cycle involves multiple stages with different morphologies in human  
35 host as well as in mosquito vector. Each stage requires a well-organized developmental  
36 program with specific regulation of gene expression and protein synthesis [1,2]. Although  
37 parasite genome encodes low number of transcriptional regulators, however post-  
38 transcriptional regulations have been shown to play important role(s) in parasite protein  
39 expression regulations [3,4]. Furthermore, comparative studies on parasite's transcriptomics  
40 and proteomics have revealed that translational regulations also play critical role(s) in parasite  
41 life cycle [5–7]. For example, during intraerythrocytic development half-life of many mRNAs  
42 are extended during the schizont stage, and also many mRNAs are kept in translationally  
43 repressed state during gametocyte and schizont stages as they are needed in subsequent stages  
44 of development [8]. *Plasmodium* structural RNAs and mRNAs are thus extensively regulated  
45 and RNA binding proteins (RBPs) having RNA binding domains (RBDs) are important  
46 players in such regulations [9,10]. In human at least 1500 RBPs have been identified so far  
47 among which RNA recognition motifs (RRMs) alone are most abundant, constituting more  
48 than 200 RBPs [11–13]. RRM, Zinc-finger domains, K homology domain (KH), Pumilio and  
49 Fem3 binding factor (Puf), Acetylation lower binding affinity family (Alba) and RNA  
50 helicases are among the best characterized RBPs in human [12–16]. In *Plasmodium*, a recent  
51 bioinformatic study has identified 189 RBPs including 72 with RRM, 11 with KLH, 2 with  
52 Puf domain, 6 with Alba domain, 31 with Zinc finger domain and 48 having helicase domains  
53 [9]. One of the abundant RBD identified in apicomplexans, particularly in *Plasmodium* spp.,  
54 is RAP domain and its role in apicomplexan has not been yet characterized fully [17–19].

55 RNA-binding domain abundant in apicomplexans (RAP) is a ~60-residues domain first  
56 identified in human MGC5297 protein and is particularly abundant in apicomplexans [17,18].  
57 Although the biological significance of the RAP domain proteins in eukaryotes, in particular

58 among apicomplexans, is yet to be established, nevertheless presence of RAP domain in  
59 proteins such as *C. reinhardtii* Raa3 that binds to tscRNA as a part of Ribonucleoprotein  
60 complex and Fas-activated serine/threonine kinase (FASTK) that interacts with TIA-1, a  
61 downstream effector of eIF2 pathway predict RNA binding function for RAP domains  
62 [20,21]. Recently, two *Plasmodium* RAP proteins have been validated as mitochondrial  
63 rRNAs binder and have been suggested to play role(s) in mitoribosome regulation [22].

64 We have previously reported a MSP-1 complex consisting of 11 merozoite surface  
65 proteins; MSP-1, MSP-3, MSP-6, MSP-7, MSP-9, RhopH3, RhopH1, RAP-1, RAP-2 and two  
66 uncharacterized RAP domain proteins; PfRAP291 (Pf3D7\_1029800) & PfRAP070  
67 (Pf3D7\_0815100) by immuno-pulldown experiments with merozoite lysate using anti-MSP-1  
68 and anti-PfRhopH3 antibodies [23]. Presence of the two RAP domain proteins; PfRAP291  
69 and PfRAP070, on merozoite surface was intriguing and required further authentication. The  
70 present study has been designed to characterize these two *P. falciparum* RAP domain  
71 proteins, PF3D7\_1029800 (PfRAP291) and PF3D7\_0815100 (PfRAP070), for their roles in  
72 RNA binding, if any, and also for their expression at asexual blood stages. *In vitro*  
73 crosslinking studies followed by immunoprecipitation suggested that these proteins bind  
74 parasite ribosomal RNA(s) and are also a part of a MSP-1 complex, suggesting their possible  
75 role(s) in invasion as well as in ribosome assembly and/or function.

76

## 77 **Methods**

78

### 79 ***In vitro Plasmodium falciparum* culture**

80 *Plasmodium falciparum* strain 3D7 was cultured on human erythrocytes in RPMI-1640 media  
81 (Invitrogen) with 4% haematocrit supplemented with 0.5% AlbuMAX<sup>®</sup> I (gibco). Parasite  
82 cultures were maintained using standard protocol described by Trager and Jensen [24].

83 Synchronization of parasite cultures were carried out using two consecutive sorbitol  
84 treatments four hours apart [25].

### 85 **Genome screening for RAP domain proteins in *Plasmodium* genomes**

86 The amino acid sequences of RAP proteins were retrieved from PlasmoDB (v49). Its  
87 physicochemical properties were identified using ProtParam (Expasy). Conserved domains  
88 were identified using Conserved Domain Database (CDD), the Simple Modular Architecture  
89 Research Tool (SMART) and Protein Family Database (PFAM). The full deduced amino acid  
90 sequence and individual conserved domains were subjected to BLAST (BLASTP) to identify  
91 orthologs in PlasmoDB and NCBI protein database. Next, we performed OrthoMCL (version  
92 5) database search to determine the orthologs of *P. falciparum*. A multiple sequence  
93 alignment was performed using the retrieved sequences, using T-COFFEE version-11 with  
94 default settings. These aligned sequences were further put to analysis by MEME motif search  
95 tool for the presence of common residues. The phylogenetic tree was inferred using the  
96 Neighbor-Joining method for computing the evolutionary distance with default setting in  
97 Molecular Evolutionary Genetics Analysis software (MEGA 7.0). Gaps and missing data  
98 were treated using partial deletion method with 95% site-coverage cut-off and 1000 bootstrap  
99 replicate to generate phylogenetic tree.

### 100 **Cloning of PfRAP291 & PfRAP070 protein fragments and their expression**

101 PfRAP291 & PfRAP070 gene fragments; 465bp for PfRAP291 and 837bp for PfRAP070  
102 were amplified from the genomic DNA of *Plasmodium falciparum* 3D7 using the primer  
103 pairs;                      PfRAP291                      Forward                      Primer-5'-  
104 CGCCATGGAAATGTTTATTTGTTCAAGACCTCAGCA-3', PfRAP291 Reverse Primer-  
105 5'-CGCCTAGGCTCGAGTACATGAATTTGCATTTGTTGT                      TTATTATTTTC-3',  
106 PfRAP070 Forward Primer-5'-GCCCATGGAAATGCCACATAA AGATTATTTAGGTGA-

107 3', PfRAP070 Reverse Primer-5'-GCCCTAGGCTCGAGGGC ATTATGTCCATTTGAGC-  
108 3'. The PCR products were cloned into pJET vector (Promega) and sequenced. The fragments  
109 were subcloned in the pET28b expression vector between NcoI and XhoI sites. The pET28b  
110 constructs of PfRAP291 & PfRAP070 were transformed into Shuffle-30 (NEB) expression  
111 host cells. Each culture was induced at 0.5 mM IPTG for 10 h at 37 °C. The cells were  
112 disrupted by sonication in lysis buffer (0.05 M Tris, pH 8.0, 0.15 M NaCl, 0.01 M DTT, 1  
113 mM PMSF, 1% Triton X-100) with 9 s pulses at 9 s intervals for 10 times using mini probe.  
114 The soluble and insoluble fractions were separated by centrifugation and analysed by SDS-  
115 PAGE followed by Western-blot analysis using anti-His antibody. The two recombinant RAP  
116 proteins (rPfRAP070 and rPfRAP291) were expressed in soluble form in *E. Coli* shuffle cells.  
117 Both the RAP proteins were purified from the supernatant using affinity-based Ni-  
118 NTA<sup>+</sup>(nitrilotriacetic acid) chromatography and eluted fractions containing >90% pure  
119 proteins were pooled and dialysed against 0.05 M Tris (pH 8), 0.015 M NaCl and 10%  
120 glycerol. Finally, the purified recombinant proteins, rPfRAP070 and rRAP291, were stored at  
121 -80 °C in aliquots.

122

### 123 **Generation of antibodies against rPfRAP291 & rPfRAP070 proteins**

124 Antibodies against rPfRAP291 & rPfRAP070 were raised in both mice and rabbit. The  
125 animals were housed and handled in accordance with the institutional and national guidelines.  
126 The institutional animal ethical committee at ICGEB, New Delhi, India, approved the animal  
127 use protocol described in the studies. The animals were bred under the guidelines of the  
128 authorizing committee. For the antibody generation, five to six weeks old female BALB/c  
129 mice were immunized with 25 µg of each protein: rPfRAP291 and rPfRAP070 emulsified in  
130 Freund's complete adjuvant on day 0, followed by three boosters of proteins emulsified with  
131 Freund's incomplete adjuvant on days 14, 28 and 42. The animals were bled for serum

132 collection on day 49. For rabbit immunization, New Zealand white female rabbits were  
133 immunized with 200 µg of either of the following recombinant proteins: rPfRAP291 &  
134 rPfRAP070 emulsified in Freund's complete adjuvant on day 0, followed by three boosters  
135 emulsified with Freund's incomplete adjuvant on days 21, 42 and 63. The animals were bled  
136 for serum collection on day 70. Antibody titres in serum samples were quantified by enzyme-  
137 linked immunosorbent assay (ELISA). Production of antibodies against rPfMSP1<sub>65</sub>,  
138 rPfMSP3N and rPfRhopH3b, have been described earlier [26–28].

139

#### 140 **Western blot analysis of *Plasmodium falciparum* 3D7 merozoite**

141 Briefly, *P. falciparum* merozoites were harvested as described by Hill et al., 2014 [29] and  
142 lysed with equal volumes of RIPA buffer for 1 hour on ice. Then, the merozoite suspensions  
143 was triturated several times with 1 ml syringe attached to 26-gauge needle. High speed  
144 centrifugation at 15,000 × g for 20 min was carried out to remove insoluble material and the  
145 parasite lysate was run on SDS-PAGE and transferred to nitrocellulose membrane. The  
146 membranes were probed with rabbit anti-PfRAP291 (1:10,000) or anti-PfRAP070 (1:10,000)  
147 antisera followed by goat anti-rabbit HRP conjugated secondary antibody (1:50,000). The  
148 membranes were developed with ECL reagent (Bio-Rad) and imaged with Chemi-Doc (Bio-  
149 Rad).

150

#### 151 ***In vivo* RNA binding analysis by UV-Crosslinking of *P. falciparum* culture and isolation 152 of bound RNA proteins**

153 Briefly, parasite cultures in late schizont stage (44-48 hpi) with 10% parasitemia were  
154 harvested, washed with PBS, and then resuspended in cold PBS. For crosslinking with media,  
155 the parasites were briefly centrifuged and excess of media were removed leaving enough  
156 media for suspension to get monolayer of cells. The resuspended cells were transferred to 10

157 cm tissue culture dish and placed on ice. The parasites were then irradiated with 254 nm UV  
158 light to a total energy of 600 mJ/cm<sup>2</sup> with intermittent mixing on ice [30–32] . The UV  
159 crosslinked cells were harvested by centrifugation.

160 After cross-linking, parasite infected red blood cells were mixed and homogenised in  
161 TRIzol™ (Invitrogen) and the homogenized lysate was incubated at room temperature (RT)  
162 for 5 min to dissociate any unstable RNA–protein interactions. The interphase purification  
163 was carried out as described by Queiroz et. al. 2019, Trendel et. al. 2019 and Villanueva et. al.  
164 2020 [32–34]. 200 µl of chloroform was added for each ml of TRIzol (1:5 v/v) to get biphasic  
165 separation. The mixture was vortexed and centrifuged for 15 min. at 12,000 × g at 4°C. The  
166 upper aqueous phase and the lower organic phase were carefully removed leaving the  
167 interphase in the tube. The interphase was again subjected to two extra phase separation  
168 cycles by adding 1 ml of TRIzol each time. After third cycle, the interphase was gently  
169 washed with RNase-free water and 0.1% SDS. The washed interphase was mixed with 4x  
170 SDS-PAGE sample buffer and proceeded for gel electrophoresis and Western blot analysis.

171

## 172 **CLIP-seq assay**

173 UV cross-linking and interphase separation was done as described above. The interphase were  
174 solubilised with 1% SDS (RNase-free). Protein-bound RNAs of the solubilised interphase  
175 were then precipitated with isopropanol (1.2 volumes) and 3M sodium acetate pH 5.2 (1/10  
176 volume). The pellet was washed with 100% ethanol followed by 70% ethanol and left for 5  
177 minutes at room temperature to dry. The dried pellet were then solubilised in nuclease-free  
178 PBS. Simultaneously, protein A/G beads (Pierce) were cross-linked with the anti-PfRAP291  
179 and anti-PfRAP070 rabbit antibodies using DSS cross-linker (Thermo Scientific™) as per the  
180 manufacturer’s protocol. The cross-linked protein A/G beads were mixed with the solubilised  
181 protein cross-linked RNAs (in PBS). RNasin™ (Promega) 2 µl/ml with DTT to a final



182 concentration of 1 mM were used to prevent RNA degradation. The mixture was incubated  
183 for 3-4 hours at RT while mixing on a nutator. The beads were then washed three times with  
184 0.1% PBST followed by one PBS wash. The washed beads were resuspended in 600  $\mu$ l of  
185 proteinase K buffer (Tris-Cl 50 mM, EDTA 10 mM, NaCl 150 mM and 1% SDS) containing  
186 4  $\mu$ l of Proteinase K and incubated at 50 °C for 1 hr with intermittent mixing. The mixture was  
187 centrifuged at 13,000 rpm for 20 minutes at 4 °C and the supernatant was subjected to RNA  
188 isolation by TRIzol. This purified RNA was further used to prepare cDNA using iSCRIPT™  
189 cDNA synthesis kit (Bio-Rad) according to the manufacturer's protocol. These cDNAs were  
190 subjected to adaptor ligation and sequencing using Illumina NGS platform. The sequencing  
191 data was then subjected to CLIP-seq analysis. Raw reads were quality checked and adaptor  
192 trimmed by using FastQC (v.0.11.9) and Trim-Galore (v.0.6.6) [35,36]. The cleaned and  
193 processed reads were further aligned with *Plasmodium falciparum* 3D7 genome and human  
194 genome using BWA (v.0.7.17-r1188) and HISAT2 (v.2.21) [37,38]. Peak calling analysis was  
195 carried out by using Samtools (v.1.10) and PEAkachu (v.0.2.0) [39,40]. MA plots were  
196 generated by using the PEAkachu results. The MEME suit was used for the identification of  
197 motifs. R package, ChIPSeeker (v.1.18.0), was used to generate pie charts [41].

198

### 199 **Blue-Native PAGE**

200 *P. falciparum* merozoites were isolated as described by Hill et. al., 2014 [29] and lysate was  
201 prepared using RIPA buffer. Briefly, Sample loading dye was prepared as mentioned in  
202 Wittig et. al., 2009 [42] and added to the merozoite lysate. The sample was run on Blue  
203 native-PAGE (4% stacking – 8% resolving) for overnight at 30 Volts in a cold room. Western  
204 blotting was performed and membrane was probed with anti-PfRAP070, anti-PfRAP291, anti-  
205 PfMSP-1<sub>65</sub>, anti-PfMSP-3N or anti-PfRhopH3b rabbit antisera 1:1,000 dilution for 2 hours.

206 Blot was subsequently incubated with secondary antibody at 1:50,000 dilution and bands were  
207 detected using chemiluminescence detection kit.

### 208 **Far western assay**

209 Far western assay was carried out according to the protocol described earlier [43]. Briefly 1-5  
210  $\mu\text{g}$  of recombinant proteins; rPfRAP070, rPfRAP291, rPfMSP-1<sub>65</sub>, rPfMSP-3N, rPfRhopH3b  
211 and a recombinant *Plasmodium* ring exported protein rPfREX (used as negative control), were  
212 run on SDS-PAGE individually and transferred to a membrane. The proteins on the  
213 membranes were denatured and renatured as described in Wu et. al., 2007 [43]. These  
214 membranes were blocked with 5% skimmed milk and incubated with 2  $\mu\text{g}/\text{mL}$  of purified  
215 interacting bait proteins, i.e., recombinant PfRAP070 or PfRAP291 in protein-binding buffer  
216 (100 mM NaCl, 20 mM Tris (pH 7.6), 0.5 mM EDTA, 10% glycerol, and 1 mM DTT) for 4  
217 hours at RT. Membranes were washed to remove the non-specific interactions and were  
218 incubated with rabbit anti-PfMSP-1<sub>65</sub> R2(1:1,000) or rabbit anti-PfMSP-3N (1:1,000) or  
219 rabbit anti-PfRhopH3b antisera (1:500) overnight at 4 °C followed by incubation with goat  
220 anti-rabbit HRP conjugated (1:30,000) or goat anti-mouse HRP conjugated (1:15,000) for 1  
221 hour at RT. Finally, the blots were developed using ECL kit (Bio-Rad) and imaged with  
222 Chemi-Doc (Bio-Rad).

223

### 224 **Co-Immunoprecipitation assay**

225 Briefly 10  $\mu\text{g}$  of rPfRAP291 and rPfRAP070 were incubated with 10  $\mu\text{g}$  of rPfMSP-1<sub>65</sub>,  
226 rPfMSP-3N or rPfRhopH3b proteins in separate reaction mixtures for 2 hours in 100  $\mu\text{l}$   
227 binding buffer (50 mM phosphate buffer at pH 7.0, 75 mM NaCl, 2.5 mM EDTA pH 8.0, 5  
228 mM MgCl<sub>2</sub>, 0.1% NP-40 and 10 mM DTT). The reaction mixture was further incubated for 2  
229 hrs at 4° C with 20  $\mu\text{l}$  of Pierce protein A/G plus agarose beads crosslinked with 20  $\mu\text{g}$  rabbit

230 of rabbit anti-PfRAP070 or anti-PfRAP291 antisera [28]. The beads were then centrifuged at  
231  $1000 \times g$  for 5 mins, washed with 200  $\mu$ l of binding buffer containing 400 mM NaCl and  
232 boiled for 5 mins in SDS PAGE sample buffer. Proteins were subsequently electrophoresed,  
233 immunoblotted and probed with either mice anti-rPfMSP-1<sub>65</sub>, anti-rPfMSP-3N and anti-  
234 rPfRhopH3b antisera followed by goat anti-mice HRP conjugated secondary antibody  
235 (1:100,000 dilution). The blots were developed using ECL kits (Bio-Rad) and imaged with  
236 Chemi-Doc (Bio-Rad).

### 237 **Indirect Immunofluorescence assay (IFA)**

238 Confocal laser scanning IFAs were performed with *P. falciparum* blood stages. Cell fixation,  
239 antibody incubation and imaging were performed by standard techniques as described earlier  
240 (13). Liquid IFA was also carried out on fixed parasites for protein localization and co-  
241 localization studies following a protocol described earlier [44,45]. Blocking of merozoite  
242 stage parasite was carried in PBS containing 10% FBS (Foetal bovine Serum) for 2 hours.  
243 Parasites were further incubated with polyclonal anti-PfRAP070 or anti-PfRAP291 sera  
244 (1:100 dilution) in PBS containing 1% FBS for 3 h. Anti-peptide PfRAP070 and anti-peptide  
245 PfRAP0291 antibodies were used at 1:50 dilution in PBS containing 1% FBS for overnight.  
246 For co-localization studies anti-PfMSP-1<sub>65</sub> (1:100), anti-PfMSP-3N (1:100) and anti-  
247 PfRhopH3 (1:100) sera were used along with anti-PfRAP291 (1:100) or anti-PfRAP070  
248 (1:100) sera. Subsequently, secondary rabbit or mice antibodies coupled with fluorophores  
249 Alexa 594 (red) and Alexa 488 (green) were used at 1:300 dilutions in PBS containing 1%  
250 FBS for 1 h. The DAPI was used for staining parasite nuclei. Finally, Microscopic  
251 examination was performed using a A1 confocal microscope (Nikon). Images were analysed  
252 using Nikon NIS Elements v 4.0 software. IMARIS image was created using the software  
253 IMARIS v 4.0.

254

255 **Invasion inhibition assay**

256 Invasion inhibition assay was performed similarly as described earlier [27]. In brief, anti-  
257 PfRAP291 and anti-PfRAP070 heat inactivated sera's were added to highly synchronized late  
258 trophozoite stage culture with 1% parasitaemia at final concentration of 5, 10 and 20% in the  
259 *in-vitro* growth inhibition assay. Anti-PfMSP-1<sub>Fu</sub> anti-sera and pre-immune rabbit anti-sera  
260 were used as positive and negative controls at concentrations of 20% serum. The cultures  
261 were incubated for 40 hours for schizont rupture and merozoite invasion. Parasitaemia was  
262 counted by FACS (Fluorescence activated cell sorter). Percentage inhibition was calculated  
263 relative to the controls. Bars indicate mean  $\pm$ SEM of triplicate measurements.

264

265 **RBC Binding Assay.**

266 Erythrocyte-binding assays were performed as recently described by Chourasia et. al., 2020  
267 [28]. In brief, 10  $\mu$ g of both recombinant RAP proteins fragments were incubated with 100  $\mu$ l  
268 of fresh packed RBC for 1 hr. The RBCs were separated from the supernatant by spinning  
269 through 600  $\mu$ l of Dibutyl phthalate (Sigma) at 12000  $\times$  g for 30 s. Proteins bound to the  
270 erythrocytes were eluted by incubation with 20  $\mu$ l of 1.5 M NaCl in PBS at room temperature  
271 for 5 mins. Eluted proteins were mixed with equal volumes of 2x non-reducing sample buffer.  
272 The eluates were analysed by immune-blotting with respective antibodies. Recombinant  
273 PfClag9c fragment was used as positive control.

274

275 **Seroprevalence analysis**

276 ELISA analysis was performed to determine the sero-reactivity of the proteins; rPfRAP070  
277 and rPfRAP0291 using sera from naturally infected malaria patients as described earlier [46].  
278 Sera from 28 *P. falciparum* malaria patients in India and 28 *P. falciparum* malaria patients in  
279 Liberia were used, while sera from 28 Danish volunteers was used as a negative control. The

280 Danish volunteers were used to determine the positive threshold. Briefly, 96-well polystyrene  
281 flat-bottom plates (Nunc-Maxisorp; Thermo Scientific) were coated with 500 ng of  
282 rPfRAP291 and rPfRAP070 protein in carbonate-bicarbonate buffer and incubated overnight  
283 at 4 °C. Next day, 96 well plates were 3 times washed with PBST (PBS containing 0.1%  
284 Tween buffer and blocked for 2 hrs in 5% milk. After a blocking step, the wells were  
285 incubated with Indian, Liberian, or Danish serum samples (1:200 dilution) at RT for 1 h,  
286 followed by incubation with HRP-conjugated goat anti-human IgG (1:3,000; Sigma) for 1 h at  
287 RT. The bound antibody was detected with tetramethylbenzidine (TMB) solution (Sigma).  
288 Plates were extensively washed between each incubation period with PBST (0.1% Tween 20).

### 289 **Statistical analysis.**

290 Graphs and statistical analysis were performed with Microsoft Excel and GraphPad Prism,  
291 version 7. Significance was calculated using Student t-test.

292

## 293 **Results**

### 294 **Genome-wide screening for RAP domain containing proteins in *Plasmodium falciparum*.**

295 Using various bioinformatic tools, 21 ortholog groups having RAP domain have been  
296 identified in genomes of different *Plasmodium* species. The sequences of all the 20 RAP  
297 domains present in the *P. falciparum* RAP domain containing proteins were extracted from  
298 PlasmoDB and UniProt databases. These sequences were aligned using T-COFFEE software  
299 version-11 (with default settings) as represented in supplementary figure S1-A. Through  
300 MEME analysis, a 28 amino-acids long common motif (represented in red box)  
301 LxxxGxxxxxxW was identified with **L**(leucine), **G**(glycine), and **W**(tryptophan) as highly  
302 conserved residues (Fig. S1-A). The p-value for the common motif identified in respective  
303 proteins is mentioned in supplementary figure S1-B. The size of the RAP domain in different

304 *P. falciparum* proteins ranged from 56 to 73 amino acids with the majority having  
305 approximately 60 amino acid residues. Interestingly, the RAP domain was always positioned  
306 at the C-terminal end of these proteins.

307 To understand the role(s) of RAP domain proteins in *P. falciparum*, we decided to  
308 characterize two RAP domain proteins; PfRAP291 and PfRAP070. Sequences similar to  
309 PfRAP291 and PfRAP070 (about 90% and 64% similarity respectively) were identified in  
310 other *Plasmodium* species and in other apicomplexans, but not in primates. RAP domain is  
311 present at C-terminal of these proteins as observed for other *P. falciparum* RAP domain  
312 proteins (Fig. S1-C & S1-D in the supplemental material).

313

#### 314 **Expression and purification of recombinant PfRAP291 and PfRAP070 protein** 315 **fragments in *Escherichia coli***

316 The rPfRAP291<sub>876-1311</sub> and rPfRAP070<sub>2088-2925</sub> gene fragments were expressed in  
317 *Escherichia coli* Shuffle 30 cells and were analysed by SDS-PAGE followed by western blot  
318 analysis using anti-His antibody (Fig. 1A-i, and Fig. S2-A & Fig. S2-B). Sub-cellular  
319 fractionation studies revealed the presence of both recombinant proteins in soluble and as well  
320 as in cell pellets. Recombinant PfRAP291 and PfRAP070 proteins were purified from the  
321 soluble fraction to near homogeneity on a Ni-NTA<sup>+</sup> column under non-denaturing conditions  
322 (Fig. 1A-ii). In case of rPfRAP291 protein, two bands of sizes; ~28 kDa and ~70 kDa were  
323 observed, while purified rPfRAP070 protein showed a single band of ~29 kDa. LC-MS/MS  
324 analysis of these bands confirmed the expression of rPfRAP291 and rPfRAP070 protein  
325 (Figure S-2C in supplemental material). Antibodies to these two RAP domain protein  
326 fragments; rPfRAP291 & rPfRAP070 were generated in mice and rabbits. We also produced  
327 anti-peptide antibodies to these proteins as indicated in figure. 1A (i).

328

### 329 **PfRAP291 and PfRAP070 proteins are expressed at asexual blood stages**

330 To study the expression and localization of PfRAP291 & PfRAP070 proteins at asexual blood  
331 stages, immunofluorescence staining of fixed *P. falciparum* parasites and western blot  
332 analysis for parasite lysate were performed using anti-PfRAP291 and anti-PfRAP070  
333 antibodies. As shown in figures 1B & supplementary figures S3-A & S3-B, a strong  
334 immunofluorescence staining was observed at merozoite, trophozoite and schizont stages for  
335 each of the two RAP domain proteins. We could observe typical surface staining for each of  
336 these proteins similar to the one reported for merozoite surface proteins [27,47]. In addition to  
337 surface staining, staining was also seen in parasite cytoplasm at trophozoite and schizont  
338 stages. To take care of specificity of staining, we also raised antibodies to peptides  
339 corresponding to each proteins. Similar staining pattern was observed using anti-peptide  
340 specific anti-bodies in merozoites (Fig. 1B). To further study the expression of these RAP  
341 proteins at merozoite stage, we next performed western blot analysis using merozoite lysate  
342 with anti-PfRAP291 or anti-PfRAP070 rabbit antibodies. An immune-reactive band  
343 corresponding to the expected size of each of the two native proteins was seen in parasite  
344 lysates of merozoites (Fig. 1C). None of these bands were observed with pre-immune sera  
345 (see Fig. S3-A-(ii) and S3-B-(ii) in the supplemental material). We next performed the LC-  
346 MS/MS analysis of the native bands by extracting proteins from gel pieces. As shown in  
347 figure S3-C, we were able to identify the native proteins in these gel bands. Together, these  
348 results demonstrate that PfRAP291 & PfRAP070 proteins are expressed at merozoite stage of  
349 the parasite.

350

### 351 **PfRAP291 and PfRAP070 bind *P. falciparum* RNA(s)**

352 Although the name “RAP” domain stands for “RNA binding domain abundant in  
353 Apicomplexan”, there has been limited work to show the RNA species that bind to these RAP  
354 domain proteins [17,18]. To know whether the PfRAP291 or PfRAP070 proteins binds

355 RNA(s), parasites were irradiated with 254 nm UV light and cell pellets were analysed on  
356 SDS-PAGE followed by western blot analysis using anti-PfRAP291 and anti-PfRAP070  
357 antibodies (Fig. 2A). As shown in figures 2B & 2C, after UV cross-linking step, we could  
358 observe both the proteins moving higher than their migration in un-crosslinked lanes. These  
359 results were further confirmed when we performed an orthogonal organic phase separation  
360 method (OOPS) on UV cross-linked lysate of *P. falciparum* late schizont stage to study the  
361 RNA-protein interactome [32–34]. The interphase was collected and protein-RNA complexes  
362 were further enriched by two subsequent TRIzol steps and was analysed for the presence of  
363 two *P. falciparum* RAP domain containing proteins; PfRAP291 and PfRAP070. We failed to  
364 get sufficient amount of interphase in non-cross linked lysate. Protein-RNA conjugates  
365 present in the enriched interphase were analysed by western blotting using specific antibodies.  
366 Schematic of the protein-RNA separation is presented in figure 2A. As shown in figure 2D,  
367 we could enrich these RNA cross-linked proteins in the interphase layer that were detected in  
368 western blot analysis, thereby suggesting interactions of the two RAP domain proteins with  
369 RNAs. This was specific as PfBiP which was used as a negative control could not be  
370 identified in the interphase (Fig. S4). Together, these results indicated that both PfRAP291  
371 and PfRAP070 bind some RNA species of *P. falciparum* origin.

372

### 373 **Identification of RNAs bound to RAP proteins.**

374 To identify RNAs interacting with PfRAP291 and PfRAP070, we performed CLIP-seq  
375 experiment in *P. falciparum*. Briefly, protein-RNA conjugates were isolated from interphase  
376 as described earlier. These protein-RNA complexes were immunoprecipitated using anti-  
377 PfRAP291 or anti-PfRAP070 rabbit antibodies. RNAs were released from immuno-  
378 precipitates by proteinase K treatment and were used to prepare cDNAs. These cDNAs were  
379 then subjected to adaptor ligation and sequencing using the high-throughput sequencing



380 Illumina NGS platform. CLIP-seq experiments were performed in duplicates. Schematics of  
381 isolation of protein-RNA complex and CLIP-seq is presented in figure 3A. The MA plot,  
382 generated using DESeq2 after initial peak calling (using PEAKachu), shows the general trend  
383 of the log<sub>2</sub> fold-change in dependence of the average mean of the expression rate of the peaks  
384 where red dots are significant peaks (Fig. 3B- i & ii). Approximately, 83% and 52% of the  
385 reads from PfRAP070 and PfRAP291 immunoprecipitates, respectively, were mapped to *P.*  
386 *falciparum* genome (Additional file1 in supplementary materials). A very low read alignment  
387 rate of ~4-8% was obtained in the human genome (Figure 3B). In total 43,139,186 (for  
388 PfRAP291) 50,285,370 (for PfRAP070) peaks sequences were detected and of these peak  
389 sequences 22,406,880 (for PfRAP291) and 41,908,250 (for PfRAP070) were found as unique  
390 peak sequences in *Plasmodium* (Fig. 3B-iii). Reproducible peaks from RNA seq data were  
391 annotated with their location in different *P. falciparum* genomic regions (5' untranslated, 3'  
392 untranslated, coding & intragenic sequences (Fig. 3C and Additional File-1). Among the top  
393 hits are the sequences that are part of 28s and 18s ribosomal RNAs (Tables 1&2 and  
394 Additional File-1). Based on the CLIP-seq analysis, several consensus motifs were identified  
395 for potential binding to these RAP proteins. The sequences of top enriched peaks from each  
396 of the two samples were used to search for enriched motifs. Figure 3D shows the top 5 motifs  
397 identified as recognition element for PfRAP291 & PfRAP070 proteins. Top twenty peak  
398 sequences identified in *P. falciparum* genome for each of the two RAP proteins CLIP-seq  
399 analysis showed that these RNAs are mainly associated with 28s (large subunit) and 18s  
400 (small subunit) ribosomal RNA (Table.1 & Table.2). Together, these results point towards a  
401 role of these proteins in ribosome assembly and/or functions.

402

403 **Association of PfRAP291 & PfRAP070 with MSP-1 complex**

404 Since these two RAP protein are expressed on merozoite surface, we next characterized these  
405 proteins for their association with other merozoite surface proteins. A Blue Native PAGE  
406 analysis of merozoite membrane extract followed by western blot analysis using anti-PfMSP-  
407 1<sub>65</sub>, anti-PfMSP-3N, anti-PfRhopH3b, anti-PfRAP291 or anti-PfRAP070 antibodies was  
408 performed. As shown in figure 4A, both RAP proteins existed in two complexes of molecular  
409 sizes ~650 kDa and ~800 kDa along with MSP-1, MSP-3 and RhopH3 proteins. To study the  
410 interaction among the components of these complexes, we next performed Far-western blot  
411 and co-immunoprecipitation analysis using a protocol described earlier [43]. For these  
412 interactome analysis, three recombinant proteins; rPfMSP-1<sub>65</sub>, rPfMSP-3N and  
413 rPfRhopH3b were generated as described earlier (see supplementary Fig. S5A) [27,28,47].  
414 For the Far-western blot analysis either of the two recombinant RAP proteins, which served as  
415 a bait proteins were run on a SDS-PAGE and blots were probed with each of the three  
416 recombinant prey proteins; rPfMSP-1<sub>65</sub>, rPfMSP-3N or rPfRhopH3b. After the incubation for  
417 1 h, each blot was developed using respective antibodies. As shown in figure S5B, all the  
418 three recombinant proteins; rPfMSP-1<sub>65</sub>, rPfMSP-3N and rPfRhopH3b interacted well with  
419 each of the two RAP proteins, thus confirming interactions among these proteins. These  
420 interactions were specific as a non-related recombinant protein, rPfREX (ring exported  
421 protein-1), which is not part of the MSP-1 complex, did not show interactions with any of the  
422 two RAP domain proteins. For the *in vitro* co-immunoprecipitation analysis, rPfRAP291 and  
423 rPfRAP070 proteins were incubated with each of the three recombinant bait proteins;  
424 rPfMSP-1<sub>65</sub>, rPfMSP-3N and rPfRhopH3b separately in a binding buffer as described in  
425 materials and methods. Bound proteins, if any, was immunoprecipitated using either anti-  
426 PfRAP291 or anti-PfRAP070 antibodies. Immunoprecipitates were run on SDS-PAGE and  
427 western blotting was performed using either anti-MSP-1<sub>65</sub> or anti-MSP-3N or anti-RhopH3b  
428 antibodies. As shown in figure 4B, each of the three MSP-1 complex associated proteins were

429 recognized by their respective antibodies in the immuno-precipitates, confirming the  
430 association of the two RAP proteins with the components of the MSP-1 complex.  
431 Recombinant PfREX protein served as a negative control and it did not show interaction with  
432 either of the two RAP proteins (Fig. 4B)

433 To further illustrate the association of PfRAP291 & PfRAP070 proteins with MSP-1  
434 complex, co-localization studies for these proteins were performed on fixed  
435 merozoites/schizonts in liquid cultures by immunofluorescence staining using their specific  
436 antibodies. PfRAP291 partially co-localized with MSP-1, MSP-3 and PfRhopH3 proteins  
437 with a Pearson's coefficients of more than 0.6 at merozoite and schizont stages, advocating  
438 the co-existence of PfRAP0291 with proteins of MSP-1 complex on the merozoite surface  
439 (Fig. 5A and Fig. S6-A) . Like-wise PfRAP070 co-localized with MSP-1, MSP-3 as well as  
440 with PfRhopH3 with a Pearson's coefficients of more than 0.6 at merozoite and schizont  
441 stages (Fig. 5B and Fig S6-B). PfRAP291 and PfRAP070 also co-localized well with each  
442 other as well (see Fig. S7-A & S7-B in the supplemental material). Together, these results  
443 unequivocally showed the presence and association of the two RAP domain proteins,  
444 PfRAP291 and PfRAP070, on the merozoite surface in a large MSP-1 associated complex.

445

#### 446 **Humoral immune responses to the RAP proteins associated with MSP-1 complex and** 447 **invasion inhibition assay**

448 To know whether PfRAP291 or PfRAP070 are immunogenic during natural infections,  
449 seroprevalence analysis was performed by ELISA for these proteins using plasma from Africa  
450 and India. GLURP-R<sub>O</sub> protein [26] was used as a positive control. Recombinant PfRAP291 &  
451 PfRAP070 proteins were frequently recognized by sera from Liberia with seropositivity rates  
452 of 78.6% and 49% respectively. Interestingly, these antigens were also recognized by sera  
453 from India with seropositivity rates of 32.10% & 17.90% respectively (Fig. 6A). The lower

454 seropositivity rates observed among Indian samples may be related to a lower transmission  
455 intensity in this area compared with that of Liberia. Indeed, the GLURP-R<sub>O</sub> seropositivity rate  
456 was 92.8% & 32.10% in Liberian and Indian sera respectively (Fig. 6A).

457 We next evaluated the inhibitory potential of anti-PfRAP291 or anti-PfRAP070 sera  
458 on the invasion of RBCs by *Plasmodium* merozoites at different sera concentrations. Rabbit  
459 anti-sera against the two RAP domain containing proteins were added at concentrations of  
460 5%, 10% and 20% in tightly synchronized *P. falciparum* culture at the late trophozoite stage.  
461 At 40 h post-infection (hpi), parasites were Ethidium bromide (Etbr) stained and analysis was  
462 carried out by fluorescence activated cell sorter (FACS). Anti-PfRAP291 specific rabbit anti-  
463 sera moderately inhibited parasite invasion with 36.8%, 42.49% and 47.97% efficacy  
464 respectively (Fig. 6 B-i). Anti-PfRAP070 rabbit sera showed inhibitory potential of 36.04% at  
465 20% serum concentration (Fig. 6 B-ii). Anti-MSP-1<sub>Fu</sub> IgG [48] served as positive control and  
466 showed an inhibition of ~55.33% at 20% serum concentration. Pre-immune rabbit sera was  
467 taken as negative control which showed 13.5% inhibition at 20% serum concentration.  
468 Together, these results showed that anti-rPfRAP291 or anti-rPfRAP070 antibodies moderately  
469 inhibit the parasite invasion.

470

#### 471 **rPfRAP291 or rPfRAP070 protein fragments do not bind human RBCs**

472 To know whether any of the two RAP protein fragments generated in this study, binds to  
473 human RBCs, an *in vitro* erythrocyte binding assay was performed. PfClag9c protein  
474 fragment that has been previously shown to bind human RBCs served as a positive control  
475 [28]. Briefly, three recombinant proteins were incubated with washed human erythrocytes in  
476 an independent reaction mixture and bound proteins were analysed by western blot using  
477 specific antibodies. As shown in supplementary figure S8, neither PfRAP291 or PfRAP070

478 showed specific interaction with erythrocytes in comparison to PfClag9c that showed nice  
479 specific binding to human erythrocytes.

480

## 481 **Discussion**

482 Apicomplexan parasites including *Plasmodium* spp. express several RAP domain proteins  
483 and only few of these proteins have been characterized. Here, we studied two RAP domain  
484 containing proteins; PfRAP291 and PfRAP070 for their expression and their binding to  
485 parasitic RNAs at asexual blood stages of *P. falciparum*. To get insights into the role of  
486 PfRAP291 or PfRAP070 at asexual blood stage, particularly in the invasion process, a  
487 segment of each of these proteins was expressed in *E. coli*, proteins were purified to > 90%  
488 homogeneity and specific antibodies were raised against these proteins. These antibodies  
489 recognized specific bands in asexual blood stage of *P. falciparum* lysates and stained the  
490 merozoite surface. Pattern of staining on *P. falciparum* schizont stage was typical of a  
491 merozoite surface protein [27,49–51]. In addition we also generated antibodies specific to  
492 peptides corresponding to these proteins and similar staining pattern was seen with anti-  
493 peptide antibodies.

494 Since these two proteins possess “RAP domain”, a putative RNA binding domain, we next  
495 looked for their interaction with parasite RNA(s). Studies in mammalian cells and  
496 *Chlamydomonas reinhardtii* have confirmed the role of RAP domain containing proteins in  
497 RNA metabolism [17]. For example, FASTK (Fas activated serine/threonine kinase), a RAP  
498 domain containing protein, has been demonstrated to play an essential role in regulation of  
499 mitochondrial ND6 mRNA levels [20,21]. Like-wise knock-out of FASTK4 has also  
500 suggested its involvement in mitochondrial RNA processing [21]. Recently using eCLIP-seq  
501 methodology in *Plasmodium*, two RAP proteins; PfRAP01 (PF3D7\_0105200) and PfRAP21  
502 (PF3D7\_1470600) have been shown to bind distinct mitochondrial rRNA transcripts

503 associated with the small and large mitoribosome subunits [22]. To provide evidence for  
504 PfRAP291 or PfRAP070 protein binding to RNAs, if any, we performed RNA-protein  
505 interaction assay in *P. falciparum* parasites using orthogonal organic-phase separation  
506 (OOPS) method [32–34], as well as CLIP-seq analysis of specific immunoprecipitates of  
507 crosslinked parasite lysates after phase separation [34]. True to the presence of RAP domain  
508 with predicted RNA binding property, we were able to identify RNA-RBPs (RNA-RNA  
509 binding proteins) interactions in *P. falciparum* parasites for both the RAP proteins, thus  
510 confirming the interactions of PfRAP291 and PfRAP070 proteins with parasitic RNA(s).  
511 Analysis of CLIP-seq data revealed that many of these RAP proteins binding RNAs can be  
512 mapped to 28s & 18s ribosomal RNAs associated with large and small ribosome subunits,  
513 thus suggesting the role(s) of these proteins in ribosome functions and/or assembly. These  
514 results, in concordance with a previous report by Hollin et. al., suggest that *Plasmodium* RAP  
515 proteins are playing important role in regulation of ribosome and/or mitoribosome  
516 assembly/functions [22].

517 Based on localization of these RAP domain proteins in parasite cytoplasm and on merozoite  
518 surface, we next looked for their association with parasite merozoite surface complex(s). A  
519 blue native page analysis of *P. falciparum* schizont stage parasite lysate followed by western  
520 blot analysis using anti-PfRAP291, and anti-PfRAP070 antibodies along with antibodies  
521 against three components of MSP-1 complex; anti-PfMSP-1, anti-PfMSP-3 and anti-  
522 PfRhopH3 antibodies revealed that these RAP proteins are part of ~650 kDa and ~800kDa  
523 MSP-1 complexes. These results were further corroborated by Far-Western and co-  
524 immunoprecipitation analysis. Together these results suggest that the two RAP proteins  
525 studied here are multifunctional proteins; having a role in ribosome regulation and also may  
526 have a role in merozoite invasion of RBCs or in parasite survival.

527 As these two RAP proteins were localized on merozoite surface, we further analysed the  
528 seroprevalence of their antibodies in *P. falciparum* infected individuals and also tested the  
529 ability of anti-PfRAP291 and anti-PfRAP070 antibodies in parasite invasion inhibition assays.  
530 Low to moderate seroprevalence was observed for both the RAP proteins and a moderate  
531 level of inhibitory potential was also observed. It is possible that these proteins, along with the  
532 associated RNA moieties, may not play a direct role in invasion. However, their interaction  
533 with parasite RNAs suggests that they may play some role(s) in ribosome assembly/function,  
534 immune modulation and cell-cell communication/signalling [52,53].

535 In summary, here we characterized two *P. falciparum* RAP domain proteins; PfRAP291  
536 and PfRAP070 for parasite RNA binding and for their association with MSP-1 complex(s).  
537 The results show the binding of these proteins with *P. falciparum* RNAs in particular with 28s  
538 and 18s ribosomal RNAs associated with large and small ribosome subunits. We further show  
539 association of these proteins with some of the merozoite surface proteins as well, thus  
540 suggesting diverse role(s) of these proteins via mechanisms yet to be explored. Further knock-  
541 out or knock-down approaches will be required to know the exact role(s) of these proteins in  
542 *Plasmodium* biology of host parasite interaction.

543

#### 544 **Declarations**

545

#### 546 **Ethical approval and consent to participate**

547 All animal experiments conducted were approved by the Institutional Animals Ethics  
548 Committee of ICGEB (IAEC-ICGEB) under the approval no ICGEB/AH/2015/01/MAL-74.  
549 Liberian and Danish sera samples are collection of Dr Michael Theisen of Statens Serum  
550 Institut. Liberian samples used here were obtained in accordance with the Liberian Institute of  
551 Biomedical Research. Ethical approval for Danish blood donor samples was given by the

552 Scientific Ethics Committee of Copenhagen and Frederiksberg, Denmark. Plasma samples  
553 from a total of 28 anonymous Danish blood, obtained for control purposes from Copenhagen  
554 University Hospital, were used. These individuals are resident of central Copenhagen and  
555 provided written consent to have a small portion of their blood stored, anonymously, and used  
556 for research purposes. Blood donors in Denmark were between the ages of 18 and 60. All data  
557 were analysed anonymously. Written informed consents were obtained from patients for all  
558 Indian sera samples (Ref. No. IESC/T-438/30.11.12). The use of sera samples in the study  
559 complied with the guidelines set by the Declaration of Helsinki.

560

#### 561 **Consent for publication**

562 Not applicable.

563

#### 564 **Availability of data and materials**

565 All data generated or analysed during this study are included in this published article (and its  
566 supplementary information files).

567

#### 568 **Competing interests**

569 The authors declare they have no competing interests.

570

#### 571 **Funding**

572 The study was supported by Department of Biotechnology, Government of India  
573 (BT/PR5267/MED/15/87/2012, BT/IN/Denmark/13/SS/2013 and flagship project; BT/IC-  
574 06/003/91) from the Department of Biotechnology, Govt. of India. PM is a recipient of the J C  
575 Bose Fellowship awarded by SERB, Govt. of India, and work is supported by the grant



576 (DST/20/015). The funders had no role in the design of the study and collection, analysis, and  
577 interpretation of data and in writing the manuscript.

578

#### 579 **Authors' contributions**

580 AA, AD, AP, IT, SP, SSS and NM performed research experiments; AA and RP did  
581 bioinformatics analysis; AA performed CLIP-seq experiments; AA, AD and ES performed  
582 inhibition assay; MT contributed tools; AA and PM designed the study, interpreted data and  
583 wrote manuscript; AM, DG and MT contributed to experiment design, data interpretation and  
584 manuscript preparation.

585

#### 586 **Acknowledgements**

587 AA acknowledges the financial support from University Grant Commission, Government of  
588 India in the form of UGC-JRF Fellowship. We thank Rotary blood bank, for providing human  
589 red blood cells. We also thank Prof. V. S. Chauhan (ICGEB, New Delhi) for providing  
590 MSP1-Fu clone. We acknowledge Bencos Research Solutions Pvt. Ltd., Thane, India, for  
591 their services in sequencing and CLIP-seq data analysis. We also thank Sheetal Kaul (Parasite  
592 Cell Biology Group, ICGEB, New Delhi) for her help in conducting CLIP-seq experiments  
593 and sequencing.

594

595

596 **References**

- 597 1. Cui L, Fan Q, Li J. The malaria parasite *Plasmodium falciparum* encodes members of  
598 the Puf RNA-binding protein family with conserved RNA binding activity. *Nucleic*  
599 *Acids Res.* 2002;30: 4607. doi:10.1093/NAR/GKF600
- 600 2. Coulson RMR, Hall N, Ouzounis CA. Comparative Genomics of Transcriptional  
601 Control in the Human Malaria Parasite *Plasmodium falciparum*. *Genome Res.*  
602 2004;14: 1548. doi:10.1101/GR.2218604
- 603 3. Doerig C, Rayner JC, Scherf A, Tobin AB. Post-translational protein modifications in  
604 malaria parasites. *Nature Reviews Microbiology.* Nature Publishing Group; 2015. pp.  
605 160–172. doi:10.1038/nrmicro3402
- 606 4. Josling GA, Williamson KC, Llinás M. Regulation of Sexual Commitment and  
607 Gametocytogenesis in Malaria Parasites. *Rev Adv first posted.* 2018.  
608 doi:10.1146/annurev-micro-090817
- 609 5. Shock JL, Fischer KF, deRisi JL. Whole-genome analysis of mRNA decay in  
610 *Plasmodium falciparum* reveals a global lengthening of mRNA half-life during the  
611 intra-erythrocytic development cycle. *Genome Biol.* 2007;8. doi:10.1186/GB-2007-8-  
612 7-R134
- 613 6. Hall N, Karras M, Raine JD, Carlton JM, Kooij TWA, Berriman M, et al. A  
614 comprehensive survey of the *Plasmodium* life cycle by genomic, transcriptomic, and  
615 proteomic analyses. *Science.* 2005;307: 82–86. doi:10.1126/SCIENCE.1103717
- 616 7. Cui L, Lindner S, Miao J. Translational regulation during stage transitions in malaria  
617 parasites. *Ann N Y Acad Sci.* 2015;1342: 1–9. doi:10.1111/NYAS.12573
- 618 8. Gomes-Santos CSS, Braks J, Prudêncio M, Carret C, Gomes AR, Pain A, et al.  
619 Transition of *Plasmodium* Sporozoites into Liver Stage-Like Forms Is Regulated by  
620 the RNA Binding Protein Pumilio. *PLOS Pathog.* 2011;7: e1002046.

- 621           doi:10.1371/JOURNAL.PPAT.1002046
- 622    9.    Reddy BN, Shrestha S, Hart KJ, Liang X, Kemirembe K, Cui L, et al. A bioinformatic  
623           survey of RNA-binding proteins in *Plasmodium*. BMC Genomics. 2015;16.  
624           doi:10.1186/s12864-015-2092-1
- 625    10.   Rios KT, Lindner SE. Protein-RNA interactions important for *Plasmodium*  
626           transmission. PLoS Pathog. 2019;15: 8–15. doi:10.1371/journal.ppat.1008095
- 627    11.   Malhotra S, Sowdhamini R. Sequence search and analysis of gene products containing  
628           RNA recognition motifs in the human genome. BMC Genomics 2014 151. 2014;15:  
629           1–11. doi:10.1186/1471-2164-15-1159
- 630    12.   Castello A, Fischer B, Frese CK, Horos R, Alleaume AM, Foehr S, et al.  
631           Comprehensive Identification of RNA-Binding Domains in Human Cells. Mol Cell.  
632           2016;63: 696–710. doi:10.1016/j.molcel.2016.06.029
- 633    13.   Gerstberger S, Hafner M, Tuschl T. A census of human RNA-binding proteins. Nat  
634           Rev Genet. 2014;15: 829–845. doi:10.1038/nrg3813
- 635    14.   Hudson WH, Ortlund EA. The structure, function and evolution of proteins that bind  
636           DNA and RNA. Nat Rev Mol Cell Biol. 2014;15: 749–760. doi:10.1038/nrm3884
- 637    15.   Hentze MW, Castello A, Schwarzl T, Preiss T. A brave new world of RNA-binding  
638           proteins. Nat Rev Mol Cell Biol. 2018;19: 327–341. doi:10.1038/nrm.2017.130
- 639    16.   Corley M, Burns MC, Yeo GW. How RNA-Binding Proteins Interact with RNA:  
640           Molecules and Mechanisms. Molecular Cell. Cell Press; 2020. pp. 9–29.  
641           doi:10.1016/j.molcel.2020.03.011
- 642    17.   Lee I, Hong W. RAP - A putative RNA-binding domain. Trends in Biochemical  
643           Sciences. 2004. pp. 567–570. doi:10.1016/j.tibs.2004.09.005
- 644    18.   Hollin T, Jaroszewski L, Stajich JE, Godzik A, Le Roch KG. Identification and  
645           phylogenetic analysis of RNA binding domain abundant in apicomplexans or RAP

- 646 proteins. *Microb Genomics*. 2021; 000541. doi:10.1099/mgen.0.000541
- 647 19. Bunnik EM, Batugedara G, Saraf A, Prudhomme J, Florens L, Le Roch KG. The  
648 mRNA-bound proteome of the human malaria parasite *Plasmodium falciparum*.  
649 *Genome Biol*. 2016;17. doi:10.1186/s13059-016-1014-0
- 650 20. Rivier C, Goldschmidt-Clermont M, Rochaix JD. Identification of an RNA-protein  
651 complex involved in chloroplast group II intron trans-splicing in *Chlamydomonas*  
652 *reinhardtii*. *EMBO J*. 2001;20: 1765–1773. doi:10.1093/emboj/20.7.1765
- 653 21. Jourdain AA, Koppen M, Rodley CD, Maundrell K, Gueguen N, Reynier P, et al. A  
654 Mitochondria-Specific Isoform of FASTK Is Present In Mitochondrial RNA Granules  
655 and Regulates Gene Expression and Function. *Cell Rep*. 2015;10: 1110–1121.  
656 doi:10.1016/j.celrep.2015.01.063
- 657 22. Hollin T, Abel S, Falla A, Pasaje CFA, Bhatia A, Hur M, et al. Functional genomics of  
658 RAP proteins and their role in mitoribosome regulation in *Plasmodium falciparum*.  
659 *Nat Commun*. 2022;13: 1–15. doi:10.1038/s41467-022-28981-7
- 660 23. Ranjan R, Chugh M, Kumar S, Singh S, Kanodia S, Hossain MJ, et al. Proteome  
661 analysis reveals a large merozoite surface protein-1 associated complex on the  
662 *Plasmodium falciparum* merozoite surface. *J Proteome Res*. 2011;10: 680–691.  
663 doi:10.1021/pr100875y
- 664 24. Trager W, Jensen JB. Human malaria parasites in continuous culture. *Science* (80- ).  
665 1976;193: 673–675. doi:10.1126/science.781840
- 666 25. Lambros C, Vanderberg JP. Synchronization of *Plasmodium falciparum* erythrocytic  
667 stages in culture. *J Parasitol*. 1979;65: 418–420. doi:10.2307/3280287
- 668 26. Paul G, Deshmukh A, Kaur I, Rathore S, Dabral S, Panda A, et al. A novel Pfs38  
669 protein complex on the surface of *Plasmodium falciparum* blood-stage merozoites.  
670 *Malar J*. 2017;16: 79. doi:10.1186/s12936-017-1716-0

- 671 27. Deshmukh A, Chourasia BK, Mehrotra S, Kana IH, Paul G, Panda A, et al.  
672 *Plasmodium falciparum* MSP3 exists in a complex on the merozoite surface and  
673 generates antibody response during natural infection. *Infect Immun*. 2018;86.  
674 doi:10.1128/IAI.00067-18
- 675 28. Chourasia BK, Deshmukh A, Kaur I, Paul G, Panda A, Rathore S, et al. *Plasmodium*  
676 *falciparum* Clag9-associated PfRhopH complex is involved in merozoite binding to  
677 human erythrocytes. *Infect Immun*. 2020;88. doi:10.1128/IAI.00504-19
- 678 29. Hill DL, Eriksson EM, Schofield L. High Yield Purification of *Plasmodium*  
679 *falciparum* Merozoites For Use in Opsonizing Antibody Assays. *J Vis Exp*. 2014;  
680 51590. doi:10.3791/51590
- 681 30. Moore MJ, Zhang C, Gantman EC, Mele A, Darnell JC, Darnell RB. Mapping  
682 Argonaute and conventional RNA-binding protein interactions with RNA at single-  
683 nucleotide resolution using HITS-CLIP and CIMS analysis. *Nat Protoc*. 2014;9: 263–  
684 293. doi:10.1038/nprot.2014.012
- 685 31. Urdaneta EC, Beckmann BM. Fast and unbiased purification of RNA-protein  
686 complexes after UV cross-linking. *Methods*. 2019. doi:10.1016/j.ymeth.2019.09.013
- 687 32. Villanueva E, Smith T, Queiroz RML, Monti M, Pizzinga M, Elzek M, et al. Efficient  
688 recovery of the RNA-bound proteome and protein-bound transcriptome using phase  
689 separation (OOPS). *Nat Protoc*. 2020;15: 2568–2588. doi:10.1038/s41596-020-0344-2
- 690 33. Queiroz RML, Smith T, Villanueva E, Marti-Solano M, Monti M, Pizzinga M, et al.  
691 Comprehensive identification of RNA–protein interactions in any organism using  
692 orthogonal organic phase separation (OOPS). *Nat Biotechnol*. 2019;37: 169–178.  
693 doi:10.1038/s41587-018-0001-2
- 694 34. Trendel J, Schwarzl T, Horos R, Prakash A, Bateman A, Hentze MW, et al. The  
695 Human RNA-Binding Proteome and Its Dynamics during Translational Arrest. *Cell*.

- 696 2019;176: 391-403.e19. doi:10.1016/j.cell.2018.11.004
- 697 35. Babraham Bioinformatics - Trim Galore! [cited 13 May 2022]. Available:  
698 [https://www.bioinformatics.babraham.ac.uk/projects/trim\\_galore/](https://www.bioinformatics.babraham.ac.uk/projects/trim_galore/)
- 699 36. Babraham Bioinformatics - FastQC A Quality Control tool for High Throughput  
700 Sequence Data. [cited 13 May 2022]. Available:  
701 <https://www.bioinformatics.babraham.ac.uk/projects/fastqc/>
- 702 37. Li H, Durbin R. Fast and accurate short read alignment with Burrows-Wheeler  
703 transform. *Bioinformatics*. 2009;25: 1754–1760. doi:10.1093/bioinformatics/btp324
- 704 38. Kim D, Paggi JM, Park C, Bennett C, Salzberg SL. Graph-based genome alignment  
705 and genotyping with HISAT2 and HISAT-genotype. *Nat Biotechnol*. 2019;37: 907–  
706 915. doi:10.1038/S41587-019-0201-4
- 707 39. Li H, Handsaker B, Wysoker A, Fennell T, Ruan J, Homer N, et al. The Sequence  
708 Alignment/Map format and SAMtools. *Bioinformatics*. 2009;25: 2078–2079.  
709 doi:10.1093/BIOINFORMATICS/BTP352
- 710 40. Bischler T, Förstner KU, Maticzka D, Wright PR. PEAKachu: a peak calling tool for  
711 CLIP/RIP-seq data. 2021 [cited 13 May 2022]. doi:10.5281/ZENODO.4669966
- 712 41. Yu G, Wang LG, He QY. ChIPseeker: an R/Bioconductor package for ChIP peak  
713 annotation, comparison and visualization. *Bioinformatics*. 2015;31: 2382–2383.  
714 doi:10.1093/BIOINFORMATICS/BTV145
- 715 42. I W, HP B, H S. Blue native PAGE. *Nat Protoc*. 2006;1: 418–428.  
716 doi:10.1038/NPROT.2006.62
- 717 43. Wu Y, Li Q, Chen XZ. Detecting protein-protein interactions by far western blotting.  
718 *Nat Protoc*. 2007;2: 3278–3284. doi:10.1038/nprot.2007.459
- 719 44. Amlabu E, Mensah-Brown H, Nyarko PB, Akuh O, Opoku G, Ilani P, et al. Functional  
720 Characterization of *Plasmodium falciparum* Surface-Related Antigen as a Potential

- 721 Blood-Stage Vaccine Target. *J Infect Dis.* 2018;218: 778–790.  
722 doi:10.1093/INFDIS/JIY222
- 723 45. Sterkers Y, Scheidig C, da Rocha M, Lepolard C, Gysin J, Scherf A. Members of the  
724 Low-Molecular-Mass Rhoptry Protein Complex of *Plasmodium falciparum* Bind to  
725 the Surface of Normal Erythrocytes. *J Infect Dis.* 2007;196: 617–621.  
726 doi:10.1086/519685
- 727 46. Courtin D, Oesterholt M, Huismans H, Kusi K, Milet J, Badaut C, et al. The quantity  
728 and quality of African children’s IgG responses to merozoite surface antigens reflect  
729 protection against *Plasmodium falciparum* malaria. *PLoS One.* 2009;4: e7590.  
730 doi:10.1371/journal.pone.0007590
- 731 47. Paul G, Deshmukh A, Chourasia BK, Kalamuddin M, Panda A, Singh SK, et al.  
732 Protein–protein interaction studies reveal the *Plasmodium falciparum* merozoite  
733 surface protein-1 region involved in a complex formation that binds to human  
734 erythrocytes. *Biochem J.* 2018;475: 1197–1209. doi:10.1042/BCJ20180017
- 735 48. Gupta PK, Mukherjee P, Dhawan S, Pandey AK, Mazumdar S, Gaur D, et al.  
736 Production and preclinical evaluation of *Plasmodium falciparum* MSP-1 19and MSP-  
737 311 chimeric protein, PfMSP-Fu24. *Clin Vaccine Immunol.* 2014;21: 886–897.  
738 doi:10.1128/CVI.00179-14
- 739 49. Paul G, Deshmukh A, Chourasia BK, Kalamuddin M, Panda A, Singh SK, et al.  
740 Protein–protein interaction studies reveal the *Plasmodium falciparum* merozoite  
741 surface protein-1 region involved in a complex formation that binds to human  
742 erythrocytes. *Biochem J.* 2018;475: 1197–1209. doi:10.1042/BCJ20180017
- 743 50. Blackman MJ, Whittle H, Holder AA. Processing of the *Plasmodium falciparum* major  
744 merozoite surface protein-1: identification of a 33-kilodalton secondary processing  
745 product which is shed prior to erythrocyte invasion. *Mol Biochem Parasitol.* 1991;49:

- 746 35–44. doi:10.1016/0166-6851(91)90128-S
- 747 51. Lin CS, Uboldi AD, Epp C, Bujard H, Tsuboi T, Czabotar PE, et al. Multiple  
748 *Plasmodium falciparum* Merozoite Surface Protein 1 Complexes Mediate Merozoite  
749 Binding to Human Erythrocytes. *J Biol Chem.* 2016;291: 7703–7715.  
750 doi:10.1074/jbc.M115.698282
- 751 52. Schofield L, Grau GE. Immunological processes in malaria pathogenesis. *Nature*  
752 *Reviews Immunology.* Nature Publishing Group; 2005. pp. 722–735.  
753 doi:10.1038/nri1686
- 754 53. Babatunde KA, Yesodha Subramanian B, Ahouidi AD, Martinez Murillo P, Walch M,  
755 Mantel PY. Role of Extracellular Vesicles in Cellular Cross Talk in Malaria. *Frontiers*  
756 *in Immunology.* Frontiers Media S.A.; 2020. p. 22. doi:10.3389/fimmu.2020.00022
- 757
- 758



759 **Table 1. Top 20 peak sequences for PfRAP291 after CLIP-seq analysis**

| S. No. | Sequences                                                                                                                                                                                                                                                                                                                                                                                                                                        | Annotation | Gene Id       | Product Description | Gene Type  |
|--------|--------------------------------------------------------------------------------------------------------------------------------------------------------------------------------------------------------------------------------------------------------------------------------------------------------------------------------------------------------------------------------------------------------------------------------------------------|------------|---------------|---------------------|------------|
| 1      | TCTTTTATGA GTA GAA AATCGTGGGGTTTGTTGAA GCGAAATA CGTGA GT<br>TTTCGTGGAA CATCTCCCTAGTGCA GATCTTGGTGGA A GTAGCAACTATTCAAA<br>TGAGAACTTTGAA GACTGAA GTGGA GAA GGGTTCTTGTCAACT                                                                                                                                                                                                                                                                        | Exon       | PF3D7_1371300 | 28S ribosomal RNA   | ncRNA gene |
| 2      | GTAACACGTAATAAATTTATTTTATTTAGTGTGTA TCAA TCGA GTTTCTGACCTA<br>TCA GCTTTTATGATTAGGGTATTGGCTAA CATGCTATGA CGGGTAACGGGG<br>AA TTAGATTTCGATTCGGGAGAGGGAGCCTGA GAAATA GCTA CCACATCTAA G<br>GAA GGCAGCA GCGCGCTAAATTA CCAATTCTAAA GAA GAGA GGTA GTGA CA<br>AGAAA TAA CAATGCAA GGCCAA TTTTGGTTTGTAA TTGGAA TGGTGGAAAT<br>TTAAAACCTTCCCA GATAA CAATTGGA GGGCAA GTCTGGTGCCA GCAGCCGC<br>GGTAATCCAGCTCCAATA GCGTATATTA AATTGTTGCAGTTAAAACGCTCGT<br>AGTTGAA | Promoter   | PF3D7_0531600 | 18S ribosomal RNA   | ncRNA gene |
| 3      | GTAACACGTAATAAATTTATTTTATTTAGTGTGTA TCAA TCGA GTTTCTGACCTA<br>TCA GCTTTTATGATTAGGGTATTGGCTAA CATGCTATGA CGGGTAACGGGG<br>AA TTAGATTTCGATTCGGGAGAGGGAGCCTGA GAAATA GCTA CCACATCTAA G<br>GAA GGCAGCA GCGCGCTAAATTA CCAATTCTAAA GAA GAGA GGTA GTGA CA<br>AGAAA TAA CAATGCAA GGCCAA TTTTGGTTTGTAA TTGGAA TGGTGGAAAT<br>TTAAAACCTTCCCA GATAA CAATTGGA GGGCAA GTCTGGTGCCA GCAGCCGC<br>GGTAATCCAGCTCCAATA GCGTATATTA AATTGTTGCAGTTAAAACGCTCGT<br>AGTTGAA | Promoter   | PF3D7_0725600 | 18S ribosomal RNA   | ncRNA gene |
| 4      | TCTTTTATGA GTA GAA AATCGTGGGGTTTGTTGAA GCGAAATA CGTGA GT<br>TTTCGTGGAA CATCTCCCTAGTGCA GATCTTGGTGGA A GTAGCAACTATTCAAA<br>TGAGAACTTTGAA GACTGAA GTGGA GAA GGGTTCTTGTCAACTGTGATTGAA<br>CAAGAGTTA GCGCGCTCTAAGGATA GCTGAAA GTGTTTAAA GAA GAAAT<br>CATTA TAA GAATTA TATAA TGAAA CTTCATCTCGAAA GGGAAACA GGTTAATA T<br>TCC                                                                                                                            | Exon       | PF3D7_0112700 | 28S ribosomal RNA   | ncRNA gene |
| 5      | TCTTTTATGA GTA GAA AATCGTGGGGTTTGTTGAA GCGAAATA CGTGA GT<br>TTTCGTGGAA CATCTCCCTAGTGCA GATCTTGGTGGA A GTAGCAACTATTCAAA<br>TGAGAACTTTGAA GACTGAA GTGGA GAA GGGTTCTTGTCAACT                                                                                                                                                                                                                                                                        | Exon       | PF3D7_1148640 | 28S ribosomal RNA   | ncRNA gene |
| 6      | GGGAAA GGA TTGGCTCTGA GGACATTA GAAA GA GAA GAAA AAAA GGG<br>TCGAAAATAAAA TTGCA GCTTTATTTGCTTTTCTTCGA TTTGCTTGAATCTG<br>CTTTTCTTTTCTTCTTTCTTTTCTCCCTCTTTTCGCCTTCACTTATTTGTA<br>ATTTTA TTACTTTAA TTTGTA CCTATAA TGTTAACTCA GAA CTGAAA CGGA CAA<br>GGGGAATCCGACTGTTAATTA AAAACATA GCA TTGTGAA                                                                                                                                                       | Exon       | PF3D7_0726000 | 28S ribosomal RNA   | ncRNA gene |
| 7      | GGGAAA GGA TTGGCTCTGA GGACATTA GAAA GA GAA GAAA AAAA GGG<br>TCGAAAATAAAA TTGCA GCTTTATTTGCTTTTCTTCGA TTTGCTTGAATCTG<br>CTTTTCTTTTCTTCTTTCTTTTCTCCCTCTTTTCGCCTTCACTTATTTGTA<br>ATTTTA TTACTTTAA TTTGTA CCTATAA TGTTAACTCA GAA CTGAAA CGGA CAA<br>GGGGAATCCGACTGTTAATTA AAAACATA GCA TTGTGAA                                                                                                                                                       | Exon       | PF3D7_0532000 | 28S ribosomal RNA   | ncRNA gene |
| 8      | AAAAATTTCTTGAA CGGGTTTTTCGGATTCA GTTCA TTTTATTTTTGTTTTGTA<br>GCAA TAGTAA TTCGTTTTATGAAATTCGGAA GTGGTAA GGA CTATCCTGAA<br>AAAA GGA GGGAA CGGCTTTGTA ACTTGGTTTCTTCTGATTCCA TTTTGTCTTC<br>TTACTCTTAATA CTGTATGA GCGTACCA CAA CCGCATCA GGTCTCCA AGG<br>TTAACGCTCTGGTTAATA GAAAAA GTAGGT                                                                                                                                                              | Exon       | PF3D7_0532000 | 28S ribosomal RNA   | ncRNA gene |
| 9      | AA GA GGTTCGTTGA AACTCAATTCAAAAATTTCTTGAA CGGGTTTTTCGGA TTC<br>AGTTCA TTTTATTTTTTTGTAGCAATA GATAATT CGTTTTATGAATTATCCG<br>AA GTGGTAAG GACTATCTTGAAAAA GGA GGGAA CCGCTTGTGA CTTGGTT<br>TCTCTGATCCATTTTGTCTTATA CTCTTAA TACTTGATGAGCGTA CCAA<br>CAACCGCATCAGGTCTCCAAGTTAA CAGCCTCTGGTTAATA GAAAAA GTA<br>GGT                                                                                                                                       | Exon       | PF3D7_0726000 | 28S ribosomal RNA   | ncRNA gene |
| 10     | GAA TGCAAA TTGATA GAAATTTAATTA GCGCA GGTAAACGGCGGA GTAA CT<br>ATGACTCTTAAGGTA GCGCAATGCTCGTCACTAATAGTGA CGCGCA TGA<br>ATGGATTAACGA GATCCCACTGTCTCTGCTACTAGCGAAA CCACA GCC<br>AAGGGAACGGCTTGGCAAATCA GCGGGGAAA GAA GACCTGTGA GCTTT<br>ACTTAGTCTGACTTTGT                                                                                                                                                                                           | Exon       | PF3D7_0112700 | 28S ribosomal RNA   | ncRNA gene |
| 11     | AA TCAATTAAGCGCA GGTAAA CGGGGGA GTA ACTATGACTCTTAA GGTA<br>GCCAATGCTCTGCA TCTAA TTAGTGA GCGCA TGA TGGAA TAA CGA GATT<br>CCACTGTCCCTA CTGCTATCTA GCGAA CCA CAGCAA GGGAA CCGGCTTG<br>GCAAAATCA CCGGGAAA GAA GA CCCTGTGA GCTTTA CTCTAGTCTGCTTT                                                                                                                                                                                                      | Exon       | PF3D7_1371300 | 28S ribosomal RNA   | ncRNA gene |

|    |                                                                                                                                                                                                                                                                                                                                                                                                                                                           |                   |               |                    |            |
|----|-----------------------------------------------------------------------------------------------------------------------------------------------------------------------------------------------------------------------------------------------------------------------------------------------------------------------------------------------------------------------------------------------------------------------------------------------------------|-------------------|---------------|--------------------|------------|
|    | GTGAAACGACTTA GAA GGTGTAGTA TAA GTGGGAG                                                                                                                                                                                                                                                                                                                                                                                                                   |                   |               |                    |            |
| 12 | AAATGGAATAGAATGGAATGGAAG                                                                                                                                                                                                                                                                                                                                                                                                                                  | Distal Intergenic | PF3D7_0514400 | tRNA Phenylalanine | ncRNA gene |
| 13 | AA TTCAATTAAGCGCA GGTAAA CGGCGGGA GTA ACTATGA CTCTCTAA GGTA GCCAATG CCTCTCATCTAA TTAGTGA CGCGCATGAA TGGATTAACGA GATT CCACTGTCCCTA CTTGCTATCTA GCGAAACCA CAGCCAA GGGAA CGGCCTTG GCAAATCA GCGGGGAAA GAA GA CCCTGTTGA GCTTTA CTCTAGTCTGGCTTT GTGAAACGACTTA GAA GGTGTAGTA TAA GTGGGAG                                                                                                                                                                         | Exon              | PF3D7_1148640 | 28S ribosomal RNA  | ncRNA gene |
| 14 | TAAA GCGGATTACCGATA CCAA GCCA TAAAA GAA CAGAAAAA TTTATTTT TTTTGAATCTTTTTATGA GTAGAAAA TCGTGGGG TTTGTGTGAA GCGAAAT ACCTGATGTTTCGTGGAAACATCTCCCTAGTGCA GATCTTGGTGAA GTAGCAA CTATTCAAATGAGAACTTTGAGACTGAA GTGGA GAAGGGTTTCTTGCAACT GTGATTGAA CAA GAGTTA GCCGCTCTTAAGGGATA GCTGAAAA GTGTTTAAAA GGGGGTTCCTCCCGTCTCAAAAGGGAAA CA GGGTTGATATTCCTGTGCCAAT AGTA TTATGAGTTCTTAGATGGTAA CATATA TATAAATGAA CTCTTTACATA GGCTTTACA CTGGGGTGCCTTTCTTTGCACTTTA CCTTATAAC  | Exon              | PF3D7_0726000 | 28S ribosomal RNA  | ncRNA gene |
| 15 | CTAAAGCGGATTA CCGATACCAA GCCATAAAA GAA CA GAAAAA TTTATTTT TTTTITAGAA TCTTTTTATGAGTA GAAAA TCGTGGGTTGTGTGAA GCGAAA TACGTGATTTTTCTGGGAA CATCTCCCTAGTGCA GATCTTGGTGAA GTAGCA ACTA TTCAAATGA GAA CTTTGAAGA CTGAA GTGGA GAA GGGTTCTTGCAAC TGTGATTGAA CAA GATTA GCCGCTCTTAAGGGATA GCTGAAAA GTGTTTAAAA AGGGGGTTCCTCCCGTCTCAAAAGGGAAA CA GGGTTGATATTCCTGTGCCAAT AGTA TTATGAGTTCTTAGATGGTAA CATATA TATAAATGAA CTCTTTACATA GGCTTTACA CTGGGGTGCCTTTCTTTGCACTTTA CCTT | Exon              | PF3D7_0532000 | 28S ribosomal RNA  | ncRNA gene |
| 16 | GGAAATGTCGTGAATTA TTCATGAATGCCTTTAA TTTGAGCAAAGTGAGCA GGAAATGCTCCCATAGA GGGTGAAA GGCCATA GTTCTTTTTAATTTATTCAT TGGAATTTTTCATGTGCGAGT CGTGTCTTGA GATTGGAGCA CTAATACGTGTG ATA CATTTCATAAAA GCTAAATA TATGTA GGAGA CCGATA GCAAA CAAGTAC CGTGAGGAAA GATGAAATA GTA CTCA GGAATGAGCAATTAATAGTACCCTG AAATCGTTAAGATGGAAC GGATTAAGAGA GAAAA CAA GTAAA GAGGGGAATT TTTAATTTTTTTGTTA TAAATCTCTTTTATAAAA GAAA CATCA GTGA                                                  | Promoter          | PF3D7_0726000 | 28S ribosomal RNA  | ncRNA gene |
| 17 | TTTTTAAATCCCCACTTTTGCCTTTTGTCTTTTGGGGA TTTGTTACTTTGAGT AAATTAGAGTGTCAAAGCAAACAGTTAAAGCATTTA CTGTGTTTGAATA CTAT AGCATGGAA TAA CAAAA TTGAA CAA GCTAAAA TTTTGTCTTTTTCTATTT TGCCCTTAGTTA CGATTAATA GGA GTAGCTTGGGACATTCGATTCAGATGTC AGAGGTGAAATCTTTA GATTTTCTGGA GACGAA CAA CTGCGAAA GCATTTGTC TAAAA TACTTCCATTAATCAA GAA CGAAA GTTAA GGGAGTGAA GACGATCA GA TACCCTCGTAATCTTAACATAAATATGCCGACTA GGTGTTGGA                                                      | Promoter          | PF3D7_0531600 | 18S ribosomal RNA  | ncRNA gene |
| 18 | GTAGCCTCTGGTTAAATGAAAAA GTA GGTAAAGGGAAGTCGGCAAAATA GA TCCGTAACCTCGGAAAA GGATTGGCTCTGAGCA TTA GAAAA GAGAA GAA AAAAA GAGGGTTGA                                                                                                                                                                                                                                                                                                                             | Exon              | PF3D7_0112700 | 28S ribosomal RNA  | ncRNA gene |
| 19 | TTCTTTTAAATCCCCACTTTTGCCTTTTGTCTTTTGGGGA TTTGTTACTTTGAG TAAATTA GAGTGTCAAAGCAAACA GTTAAAGCATTTACTGTGTTTGAATACTA TAGCATGGAAATA CAAAA TTGAA CAA GCTAAAA TTTTGTCTTTTTCTTATT TTGGCTTAGTTA CGATTAATA GGA GTA GCTTGGGGA CATTCGATTCAGATGT CAGAGGTGAAATCTTA GATTTTCTGAGAG CAACTGCGAAA GCA TTTGT CTAAAAATA CTCCATTAATCAAGAACGAAAGTTAAGGGAGT GAA GACATCAG ATACCGTGTAA TCTTAACCATAAA CTATGCCGACTA GGTGTTGGA                                                          | Promoter          | PF3D7_0725600 | 18S ribosomal RNA  | ncRNA gene |
| 20 | AGTTTGACAAATA TTTACATATA                                                                                                                                                                                                                                                                                                                                                                                                                                  | 3' UTR            | PF3D7_0527700 | tRNA Glutamic acid | ncRNA gene |

760

761



|    |                                                                                                                                                                                                                                                                                                                                                                                                                                                                                                        |          |               |                      |               |
|----|--------------------------------------------------------------------------------------------------------------------------------------------------------------------------------------------------------------------------------------------------------------------------------------------------------------------------------------------------------------------------------------------------------------------------------------------------------------------------------------------------------|----------|---------------|----------------------|---------------|
| 13 | TAAAGCGGATTACCGATACCAAGCCATAAAAGAAAGCAAAAAATTTATTTTTTTT<br>TTA GAATCTTTTTATGA TAGAAAATCGTGGGTTTGTGTTGAAGCGAAATACGT<br>GAGTTTTCTGTGGAA CATCTCCCTA GTGCA GATCTTGGTGGAA GTAGCAACTATT C<br>AAATGA GAA CTTTGAAGACTGAA GTG GAA GGGTTTCTGTCAA CTGTGATTGA<br>ACAA GAGTTAGCCGCTCTAA GGGATA GCTGAAA GTGTTTAAAA GGGGTTCC<br>TTCCCGCTCTAAAAGGGAAA CAGTTGATATTCTGTGCCAA TAGTATTA GAGT<br>TTCTTAGATGGTAA CATATATATAAATGA ACTCTTTA CATAGGCTTACA CTCGG<br>GGTGCGTTTTCTTGCACTTACCTTTATAACAAACCTTGGATCAATTTACTTGGAG<br>G | Exon     | PF3D7_0726000 | 28S ribosomal<br>RNA | ncRNA<br>gene |
| 14 | AAAGCATTCTGATATTATTGAA TTTTAAAGAACTGTTCTTATA TTTCTCCATT<br>TCTATGGAGACATAGCCA GGTGGGAGTTTGA CTGGGGCGGTACA                                                                                                                                                                                                                                                                                                                                                                                              | Exon     | PF3D7_1148640 | 28S ribosomal<br>RNA | ncRNA<br>gene |
| 15 | ACATTTGTAGGACCCGAGA GGCTTTGAACTAA GCGTGATGAGA TTGAAGTCA GA<br>CGAAAGTCTGATGGAGGATCGAGTTGATA CTGACGTGCAAACTGTTCAATCAAT<br>CACGTTTAGGGGCGAAAGATA TCGAAAA GCCTATTAGCTGTTATTTTCGAAA<br>GATCTCTCAGGATCGCTGGAGTTGAG                                                                                                                                                                                                                                                                                          | Exon     | PF3D7_1148640 | 28S ribosomal<br>RNA | ncRNA<br>gene |
| 16 | TTCAA TTAAGCGCAGTAAACGCGGGGATAACTA TGA CTCTTAA GGTA GCCA<br>AATGCCTCGTCACTAA TTAGTGA CGCGCATGAA TGGATTAACGA GATTCCCACT<br>GTCCCTACTTGCTATCTAGCGAAA CCACA GCCAA GGGAACGGGCTTGCAAAAATC<br>AGCGGGGAAA GAA GACCCTGTTGA GCTTTA CTCTAGTCTGGCTTGTGAAACGAC<br>TTAGAAGGTGTAGTATAAGTGGGAG                                                                                                                                                                                                                        | Exon     | PF3D7_1371300 | 28S ribosomal<br>RNA | ncRNA<br>gene |
| 17 | TTTTATTTTTGTTTAA TAACTCTCTTTTATTA AAA GAAACATCA GTGATTAATTA<br>ATTTCAATAAA GCAATCCCTGAAATTCAAAATTTCTTTTAAATTTGTTTTCACCTTC<br>TCCCGCCTAAATGTGGGGAAAACGGCTTATTTCTCAA TTAATTTTTTGTCTGA<br>GG                                                                                                                                                                                                                                                                                                              | Promoter | PF3D7_0112700 | 28S ribosomal<br>RNA | ncRNA<br>gene |
| 18 | ATTAA GCGCAGGTAAA CGGCGGGA GTAA CTATGACTCTTAA GGTAAGCCAAAT<br>GCCTCGTCATCTAA TTAGTGACGCGCATGAATGGATTAACGA GATTCCCACTGTCC<br>CTACTTGCTACTAGCGAAA CCACA GCCAA GGGAACGGGCTTGCAAAATCAGCG<br>GGGAAA GAA GACCCTGTTGACCTTTA CTCTAGTCTGACTTTGTAACG                                                                                                                                                                                                                                                             | Exon     | PF3D7_0112700 | 28S ribosomal<br>RNA | ncRNA<br>gene |
| 19 | TTTGGGGATTTTGTTA CTTTGA GTAAA TTAGA GTGTTCAA GCAAA CAGTTAAA GC<br>ATTTACTGTGTTTGA TACTATA GCA TGGAA TAA CAAAATTGAACAAGCTAAAA TT<br>TTTTGTTCTTTTTCTTA TTTTGGCTTAGTTACGATTAATA GGAGTA GCTTGGGGAC<br>ATTCGTATTCAGATGT CAGAGGTGAAA TTCTTA GATTTCTGGA GACGAA CAACT<br>GCGAAAGCA TTTGTCTAAAATA CTCCATTAATCAA GAACGAAAGTTAAGGGAGT<br>GAA GACGATCAGATACCGTCTAATCTTAACCA TAAACTATGCCGACTAGGTGT<br>GGATGAAAAGTGT                                                                                                 | Promoter | PF3D7_0531600 | 18S ribosomal<br>RNA | ncRNA<br>gene |
| 20 | ACATTTGTAGGACCCGAGA GGCTTTGAACTAA GCGTGATGAGA TTGAAGTCA GA<br>CGAAAGTCTGATGGAGGATCGAGTTGATA CTGACGTGCAAACTGTTCAATCAAT<br>CACGTTTAGGGGCGAAAGATA TCGAAAA GCCTATTAGCTGTTATTTTCGAAA<br>GATCTCTCAGGATCGCTGGAGTTGAG                                                                                                                                                                                                                                                                                          | Exon     | PF3D7_1371300 | 28S ribosomal<br>RNA | ncRNA<br>gene |

763

764

765

766 **Figure Legends :**

767

768 **Fig. 1. Expression of recombinant proteins, rPfRAP291 and rPfRAP070, and**  
769 **the expression analysis of native PfRAP291 and PfRAP070 at *P. falciparum***  
770 **asexual blood stages. (A-i).** Schematic showing the organization of PfRAP291  
771 and PfRAP070, two *P. falciparum* RAP domain proteins. Double-head blue  
772 arrows indicate the size of protein fragments expressed. Boxed sequences show  
773 the peptide sequence used to generate peptide antibodies for each protein. FP-  
774 forward primer; RP-reverse primer **(A-ii)**. Coomassie stained SDS-PAGE and  
775 western blot analysis showing the purified rPfRAP291 and rPfRAP070 protein  
776 fragments. Western blot analysis were performed using anti-His antibody. **(B)**  
777 Immunofluorescence assays (IFA) followed by confocal microscopy showing  
778 localization of PfRAP291 **(B-i)** and PfRAP070 **(B-ii)** proteins at *P. falciparum*  
779 merozoite stage. Scale Bar represents 1  $\mu$ m. **(C)** Western-blot analysis showing  
780 the expression of native PfRAP291 **(C-i)** and PfRAP070 **(C-ii)** proteins at *P.*  
781 *falciparum* asexual blood stage (merozoite).

782

783 **Fig. 2. Identification of RNA-protein interactions using orthogonal organic**  
784 **phase separation. (A)** Schematic representation of the UV cross-linking and  
785 organic phase separation procedures. **(B & C)** Western-blot analysis showing  
786 electromobility-shift of RAP domain proteins **(B: PfRAP291 & C: PfRAP070)** on  
787 SDS-PAGE after UV cross-linking. **(D)** Western-blot analysis showing the  
788 presence & enrichment of PfRAP291 and PfRAP070 proteins in the purified  
789 TRIzol interphase after UV cross-linking of the parasites.

790

791 **Fig. 3. CLIPseq analysis reveals binding of RNAs with PfRAP291 and**  
792 **PfRAP070.** (A) Schematic illustrating the key steps of CLIPseq protocol. (B)  
793 MA plots (i and ii) of initial peaks called using PEAKachu for *Plasmodium*  
794 *falciparum*. MA stands for M (log ratio) and A (mean average). The blue lines  
795 depict the normalisation constants. Red dots are significant peaks. The table (iii)  
796 shows the summary of all read alignments. (C) Representative chart illustrating  
797 the proportion of peak distribution in 3'UTR, 5'UTR, exons, introns, downstream  
798 regions and distal intergenic regions for PfRAP291(i) and PfRAP070(ii) bound  
799 RNAs. (D) Top 5 consensus motifs identified by CLIPseq analysis for  
800 PfRAP291(i) and PfRAP070(ii).

801

802 **Fig. 4. PfRAP291 and PfRAP070 are associated with a MSP-1 associated**  
803 **complex.** (A) Blue Native PAGE followed by western blot analysis of merozoite  
804 lysate, using anti-MSP-1<sub>65</sub>, anti-MSP-3N, anti-RhopH3b, anti-PfRAP291 and  
805 anti-PfRAP070 rabbit sera. All the sera recognized common ~650 kDa and ~800  
806 kDa bands, while pre-immune sera failed to recognize any such band. (B) Co-  
807 immunoprecipitation analysis showing the interaction of the two RAP domain  
808 proteins, rPfRAP291 and rPfRAP070, with the proteins of MSP-1 complex;  
809 rPfMSP-1<sub>65</sub>, rPfMSP-3N and rRhopH3b.

810

811 **Fig. 5. Co-localization studies on *P. falciparum* merozoite stage parasites**  
812 **using immunofluorescence assay:** Immunofluorescence assays (IFA) followed  
813 by confocal microscopy imaging. (A) IFA images showing co-localization of  
814 PfRAP291 with PfMSP-1, PfMSP-3 and PfRhopH3. (B) IFA images showing co-

815 localization of PfRAP070 with MSP1, MSP-3 and PfRhopH3b. P = Pearson's  
816 coefficient; TD = transmitted light channel. IMARIS software was used to  
817 convert confocal images into clear informative schematics. Scale bar represents 1  
818  $\mu\text{m}$ .

819

820 **Fig. 6. Naturally acquired immune responses and vaccine potential of**

821 **PfRAP291 and PfRAP070 proteins. (A)** Naturally acquired humoral antibodies  
822 against rPfRAP291 and RAP070 proteins in Indian and Liberian populations.

823 ELISA was performed to analyse seroprevalence against RAP proteins in 28  
824 naturally infected sera from areas of malaria endemicity in Liberia and India. The  
825 dotted line represents positivity threshold limits calculated by mean relativities  
826 twice the SEM results from 28 serum samples from Danish nonimmune sera. **(B)**

827 Bar graph representing invasion inhibition using **(i)** anti-PfRAP291 and **(ii)** anti-  
828 PfRAP070 rabbit sera in concentration dependant manner. FACS analysis was  
829 done to determine parasite after 40 h of incubation. Data represents the means of  
830 3 replicates, and error bars represent standard errors of the means. Significant  
831 results are indicated as follows: \*\*\*,  $p \leq 0.005$ ; \*\*,  $p \leq 0.05$ ; \*,  $p \leq 0.05$ . All other  
832 comparisons show no significant differences.

833

# Figure 1

A

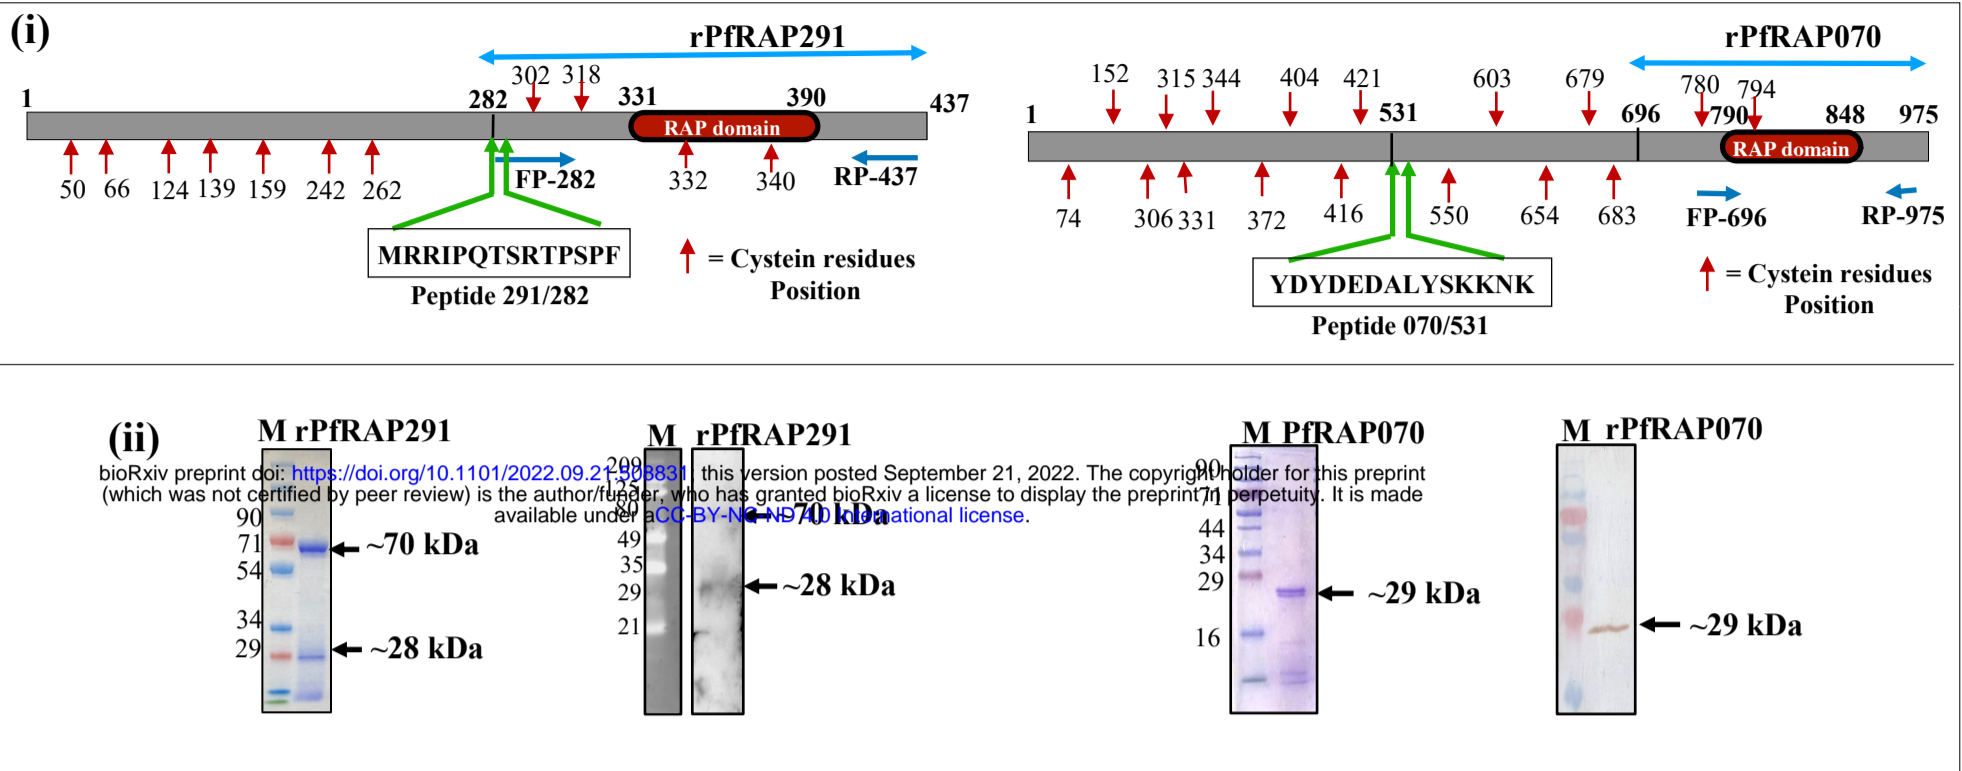

B

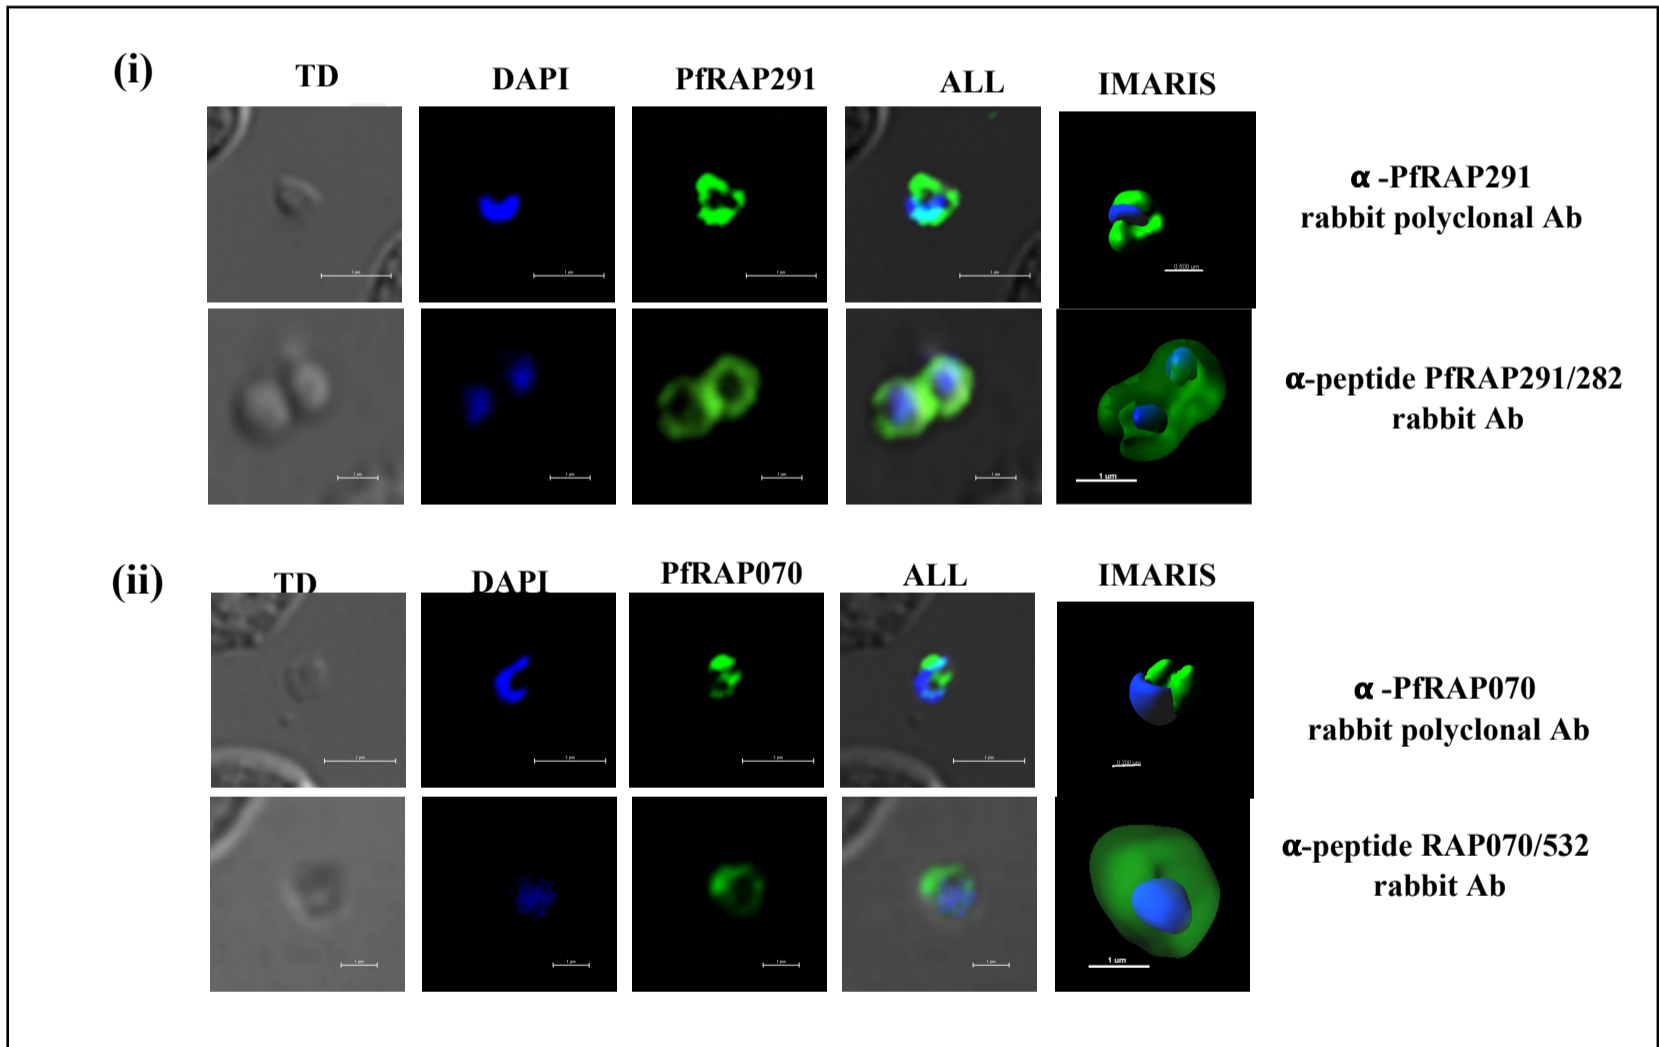

C

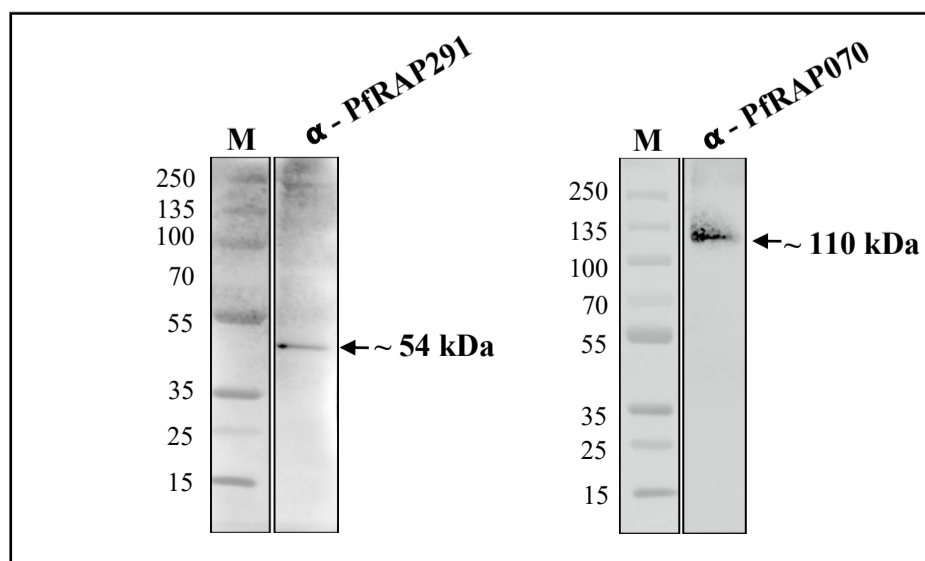



# Figure. 2

**A**

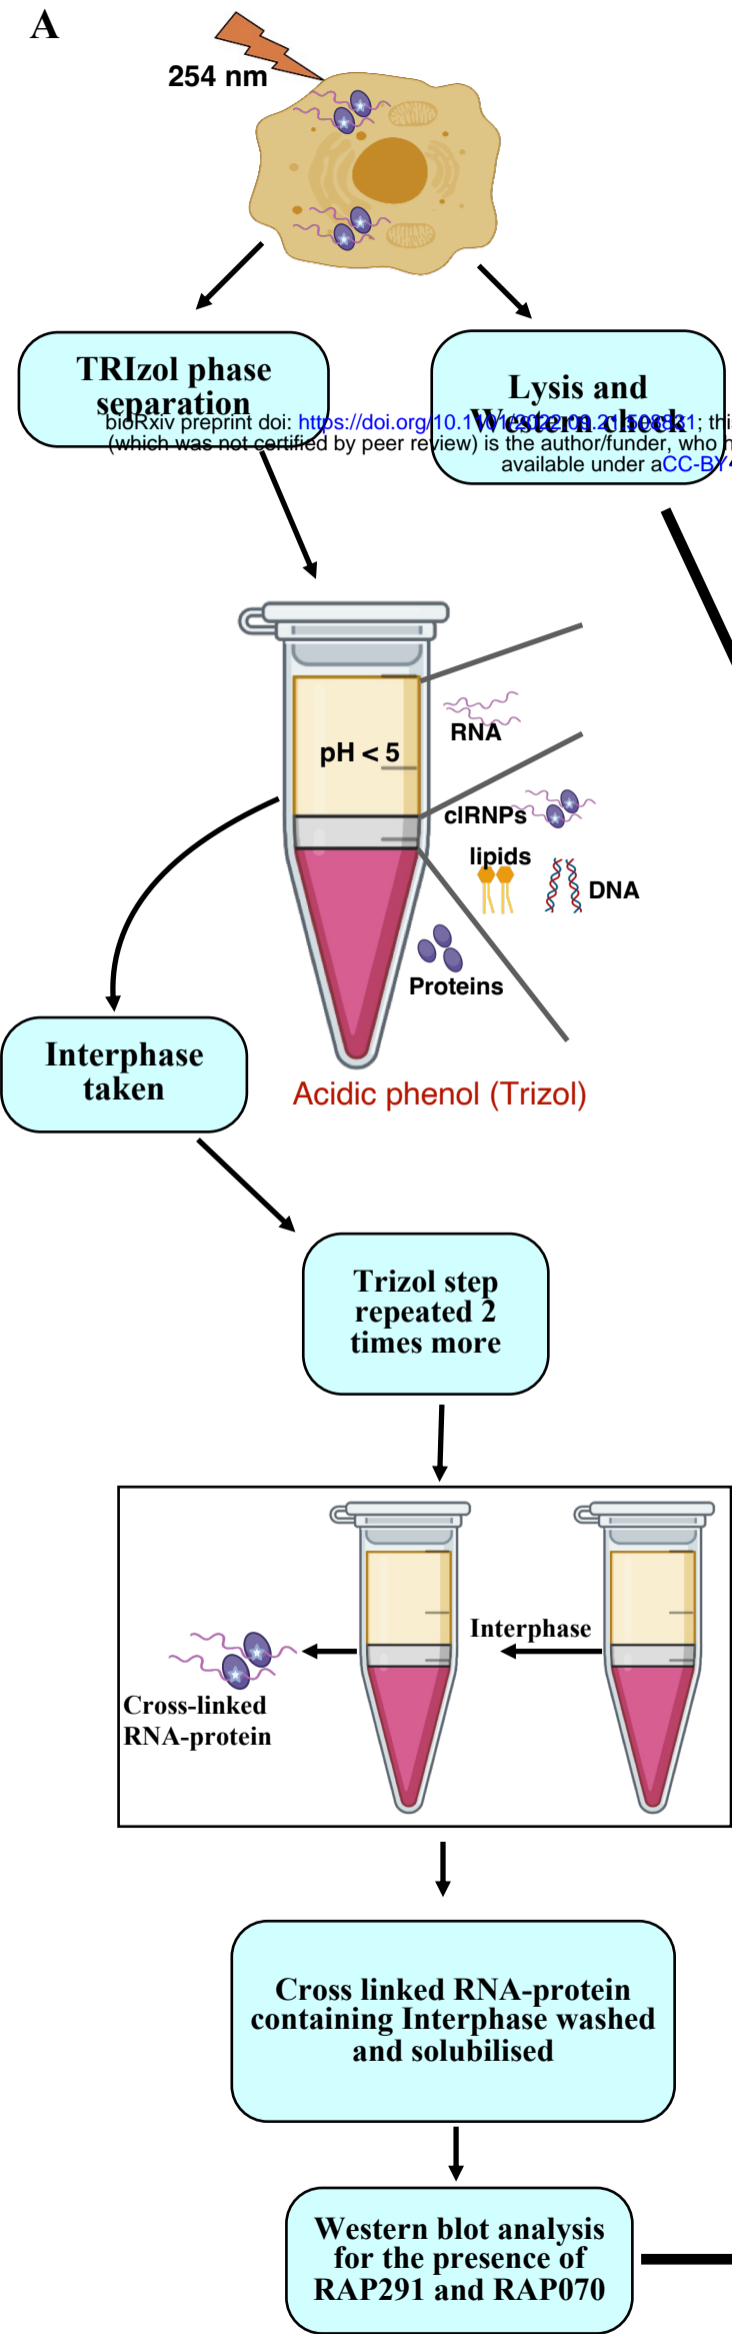

**B**

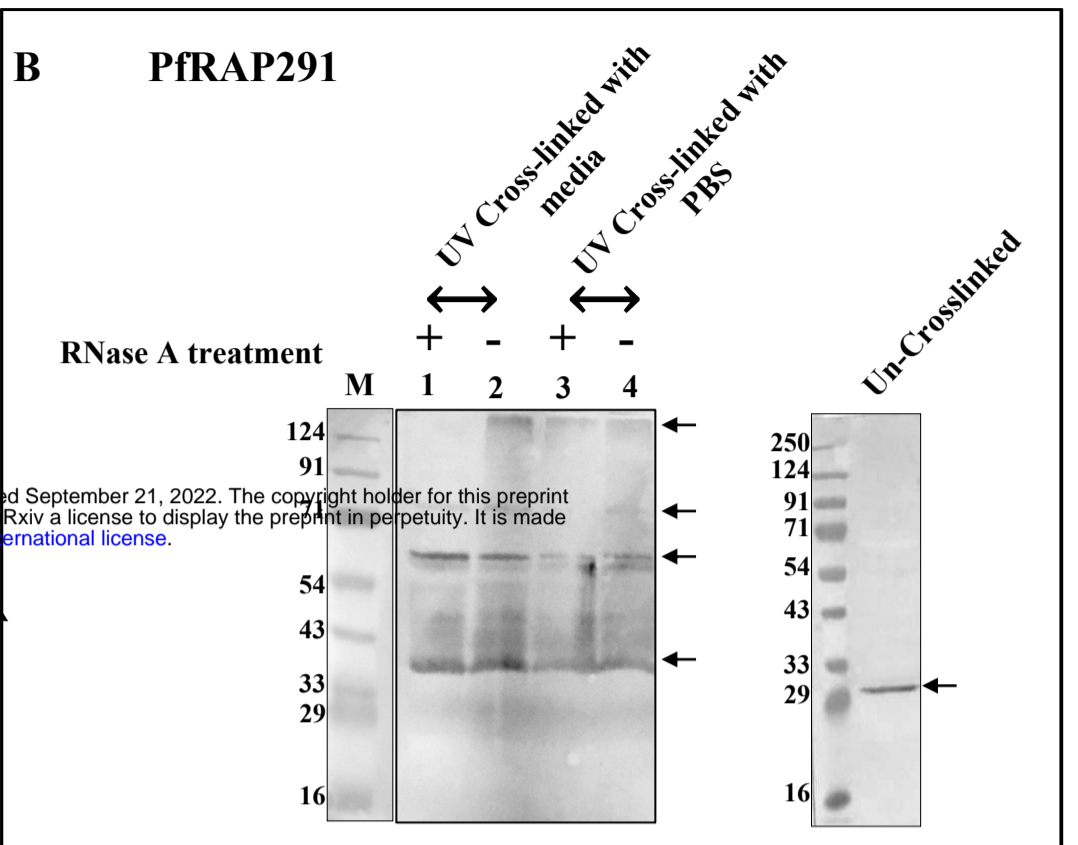

**C**

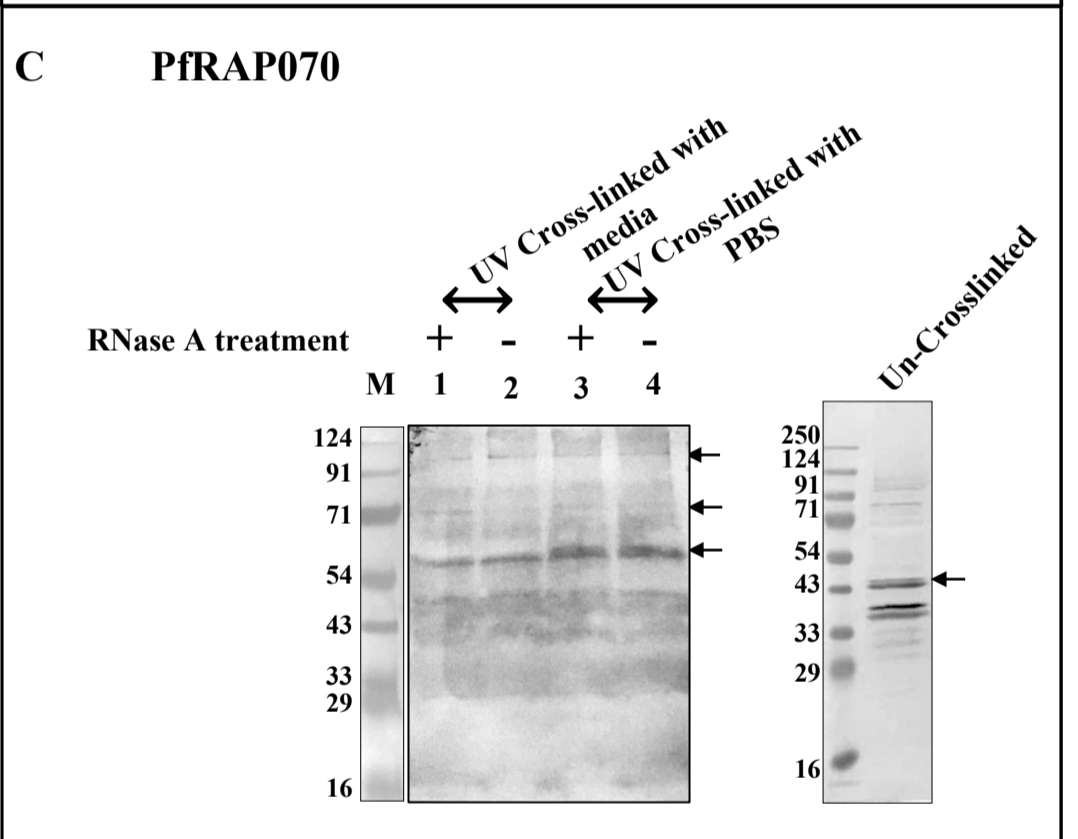

**D**

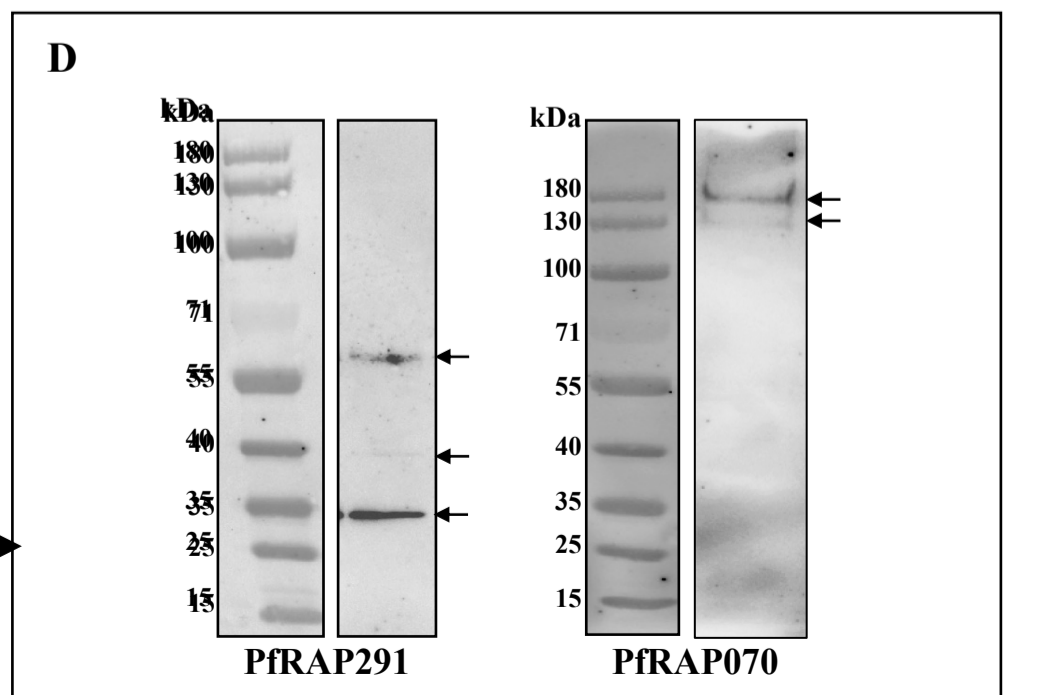

# Figure. 3

A

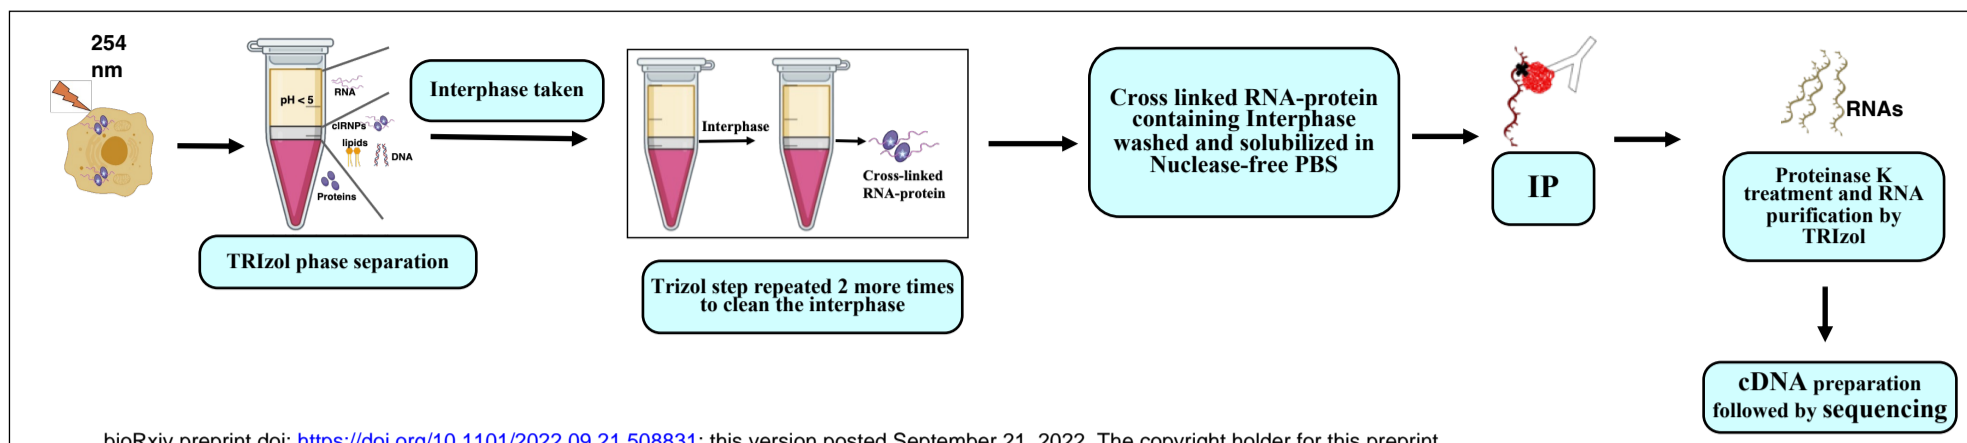

bioRxiv preprint doi: <https://doi.org/10.1101/2022.09.21.508831>; this version posted September 21, 2022. The copyright holder for this preprint (which was not certified by peer review) is the author/funder, who has granted bioRxiv a license to display the preprint in perpetuity. It is made available under aCC-BY-NC-ND 4.0 International license.

B

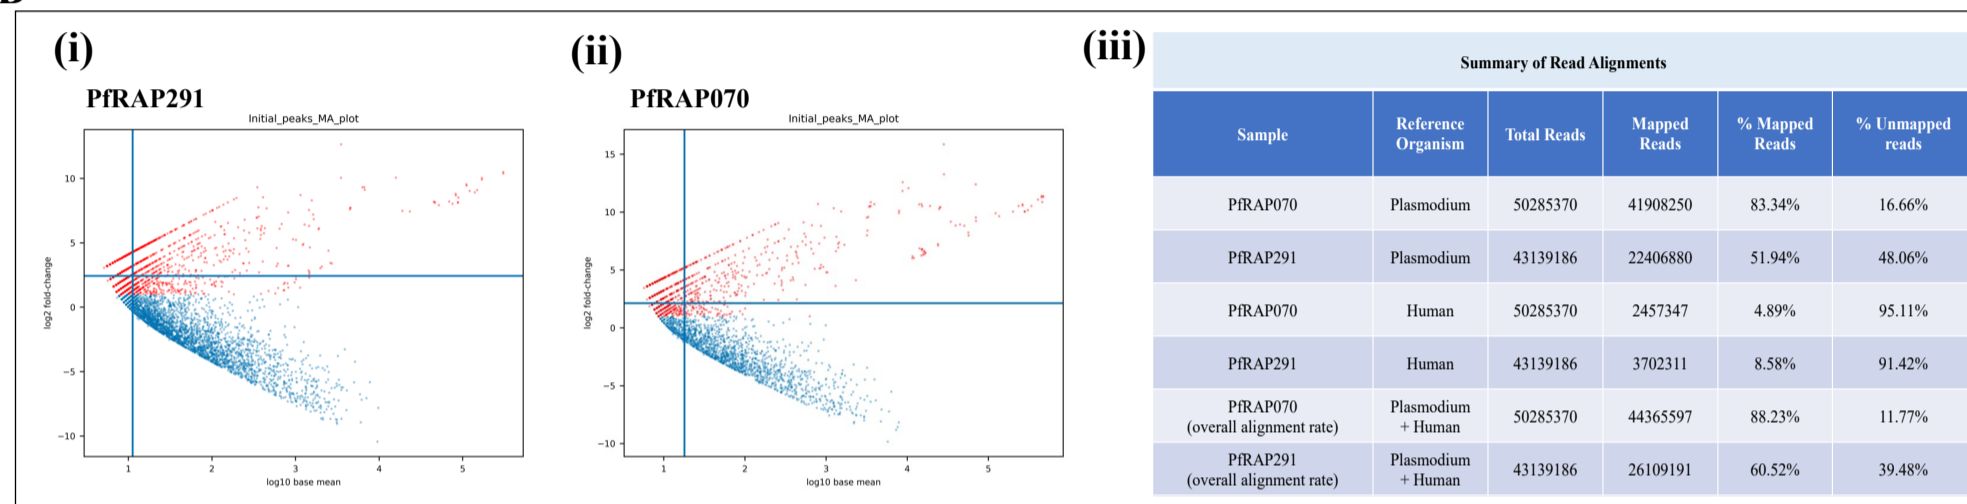

C

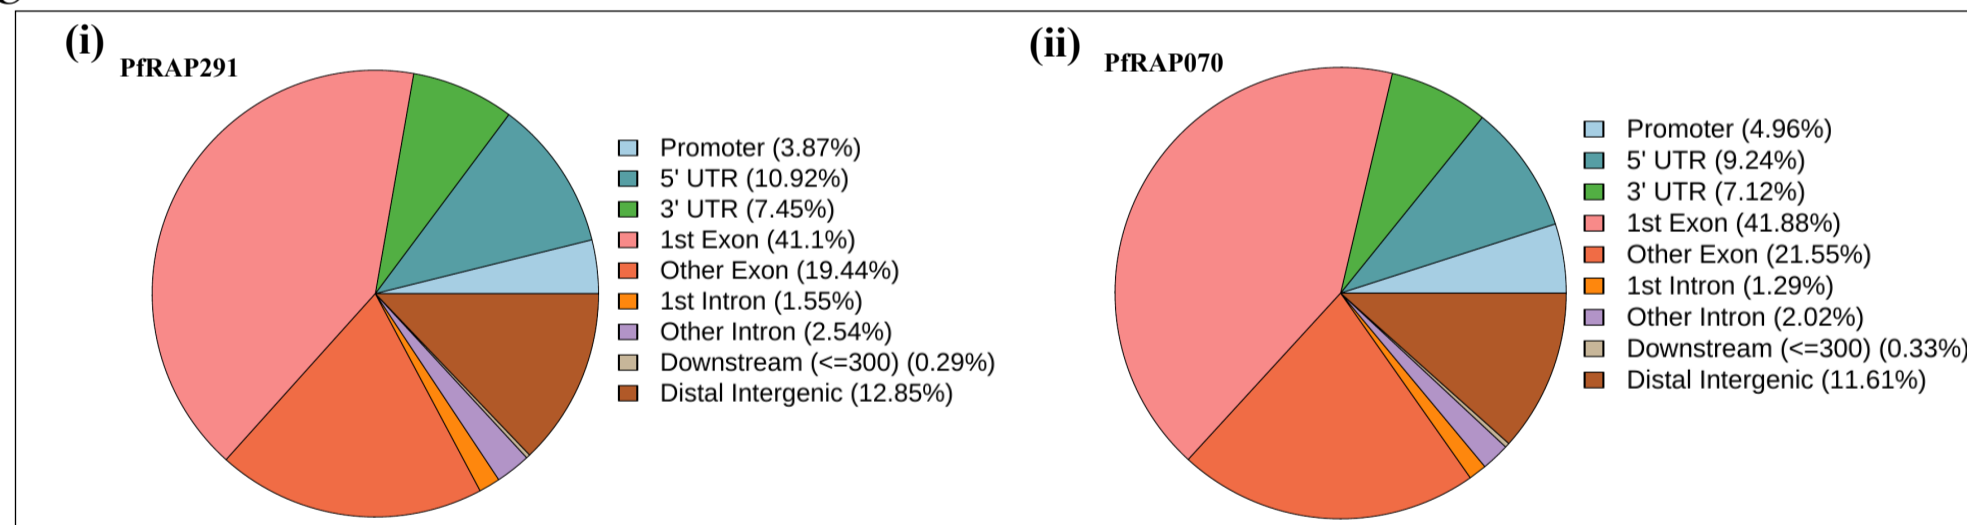

D

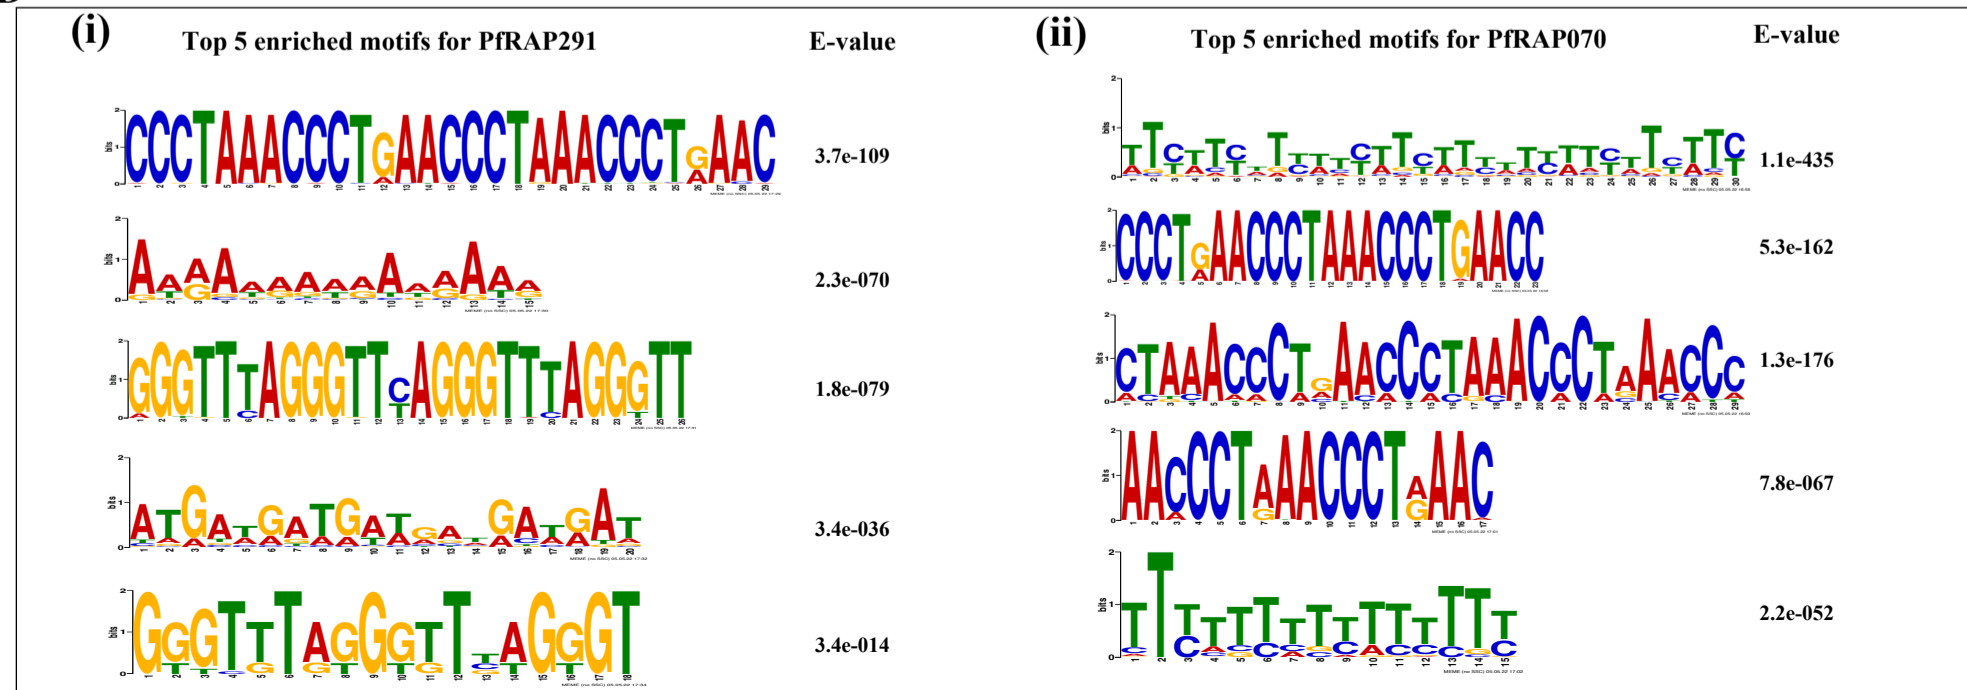

# Figure 4

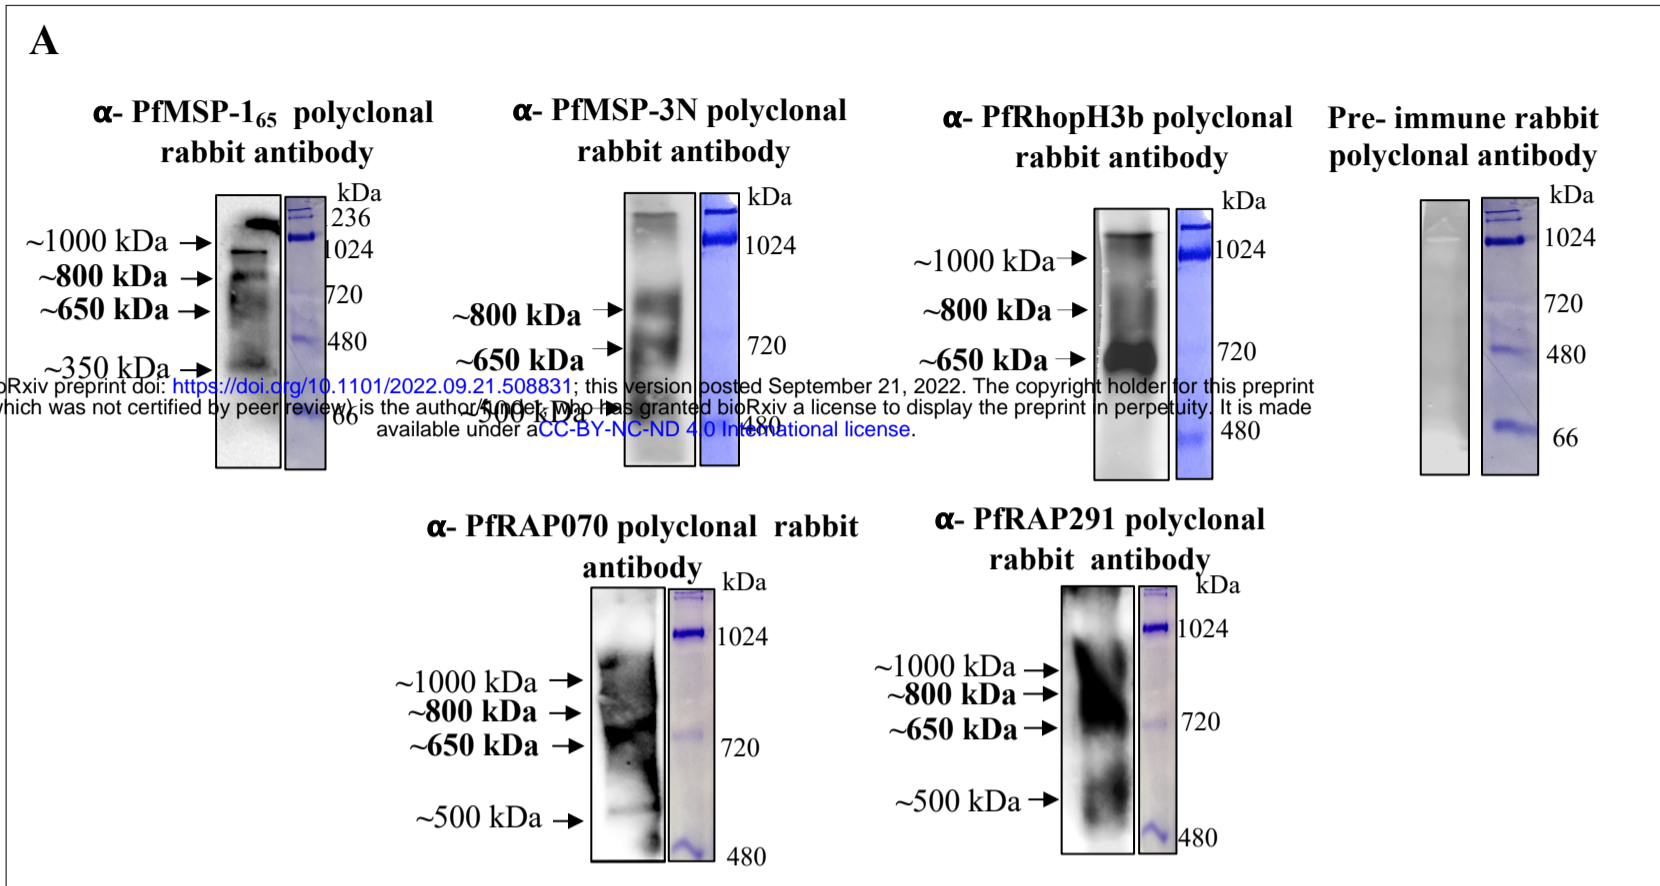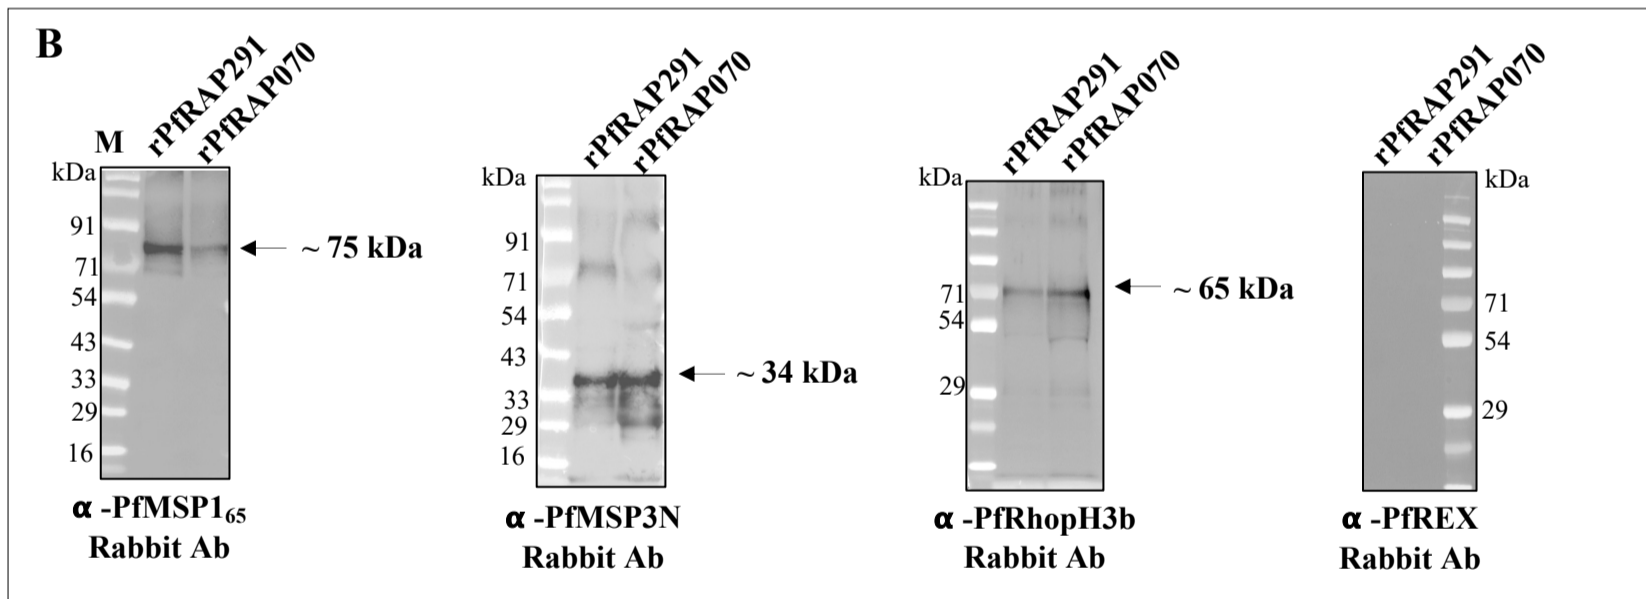

# Figure 5

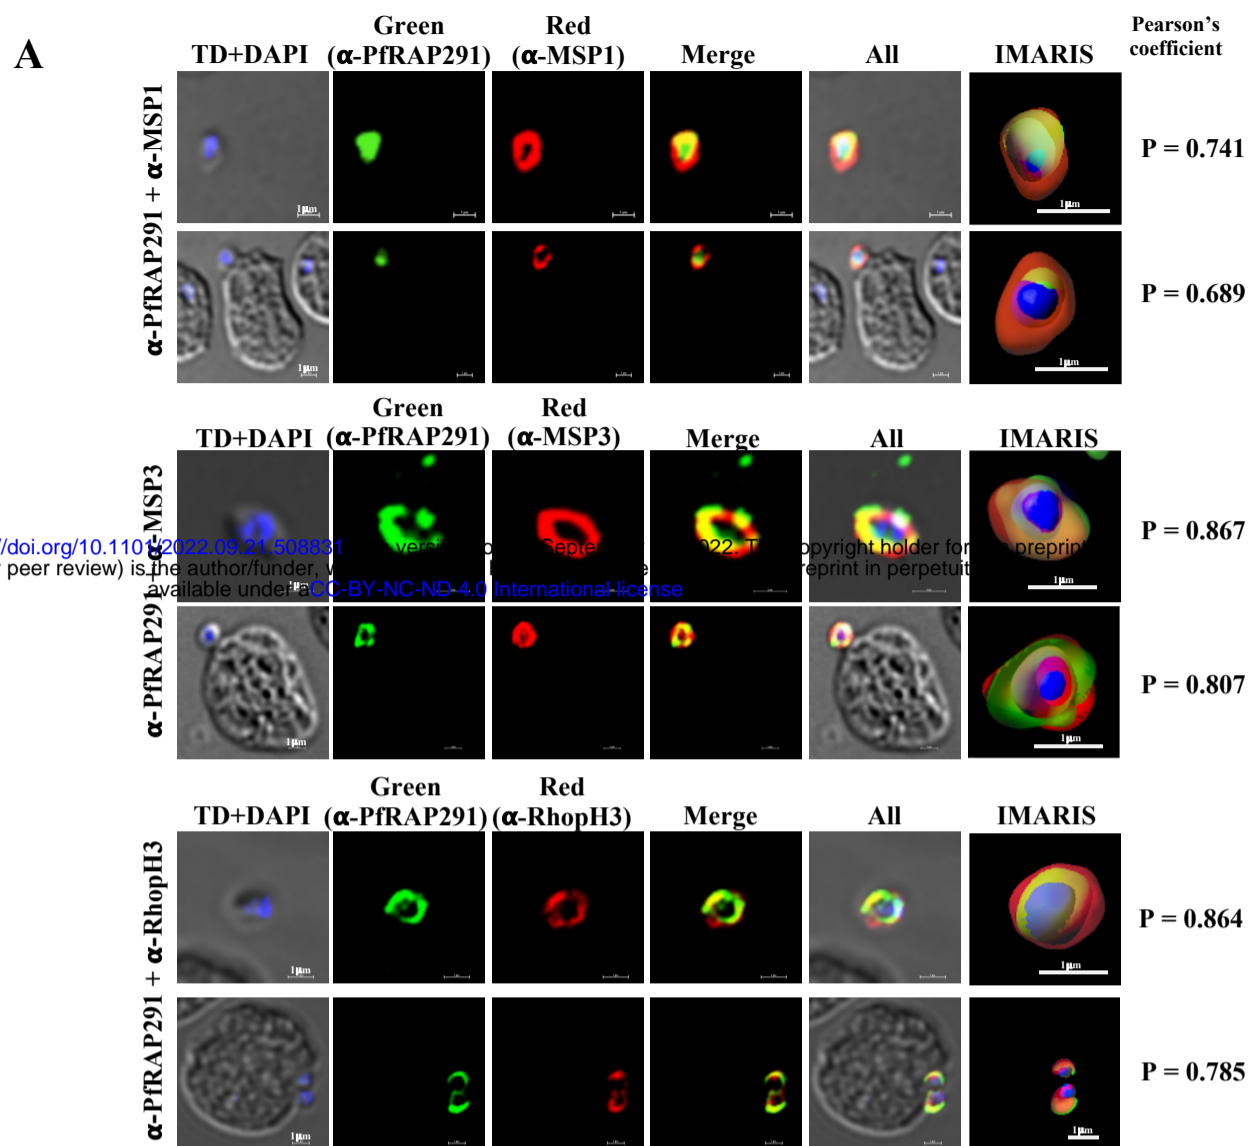

bioRxiv preprint doi: <https://doi.org/10.1101/2022.09.21.509231>; this version posted September 22, 2022. The copyright holder for this preprint (which was not certified by peer review) is the author/funder, who has granted bioRxiv a license to display the preprint in perpetuity. It is made available under aCC-BY-NC-ND 4.0 International license.

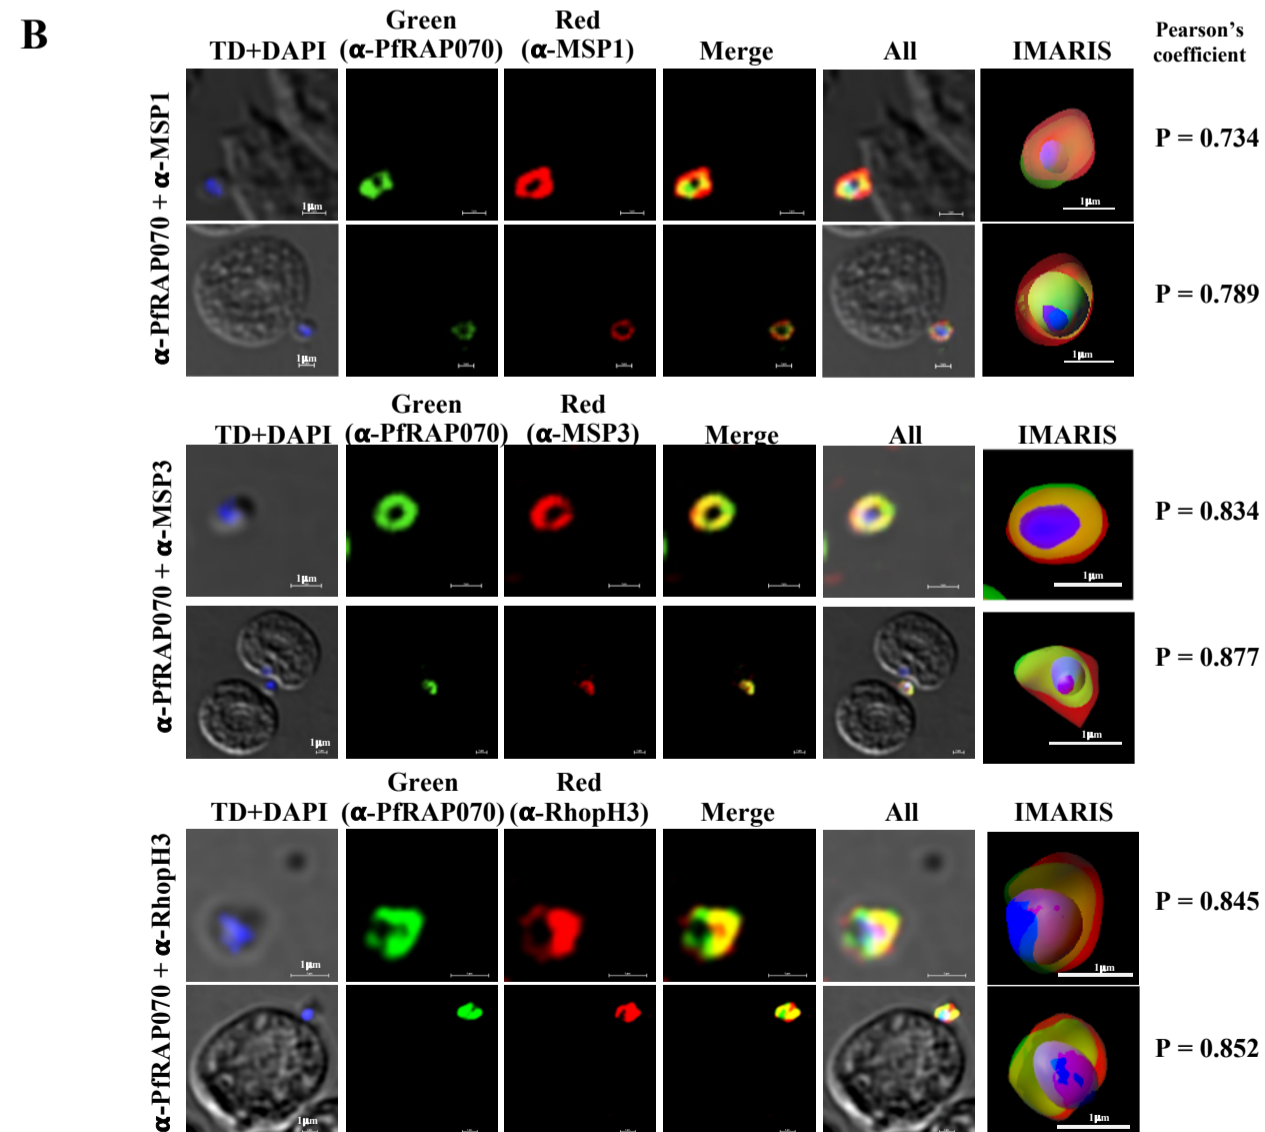

# Figure 6

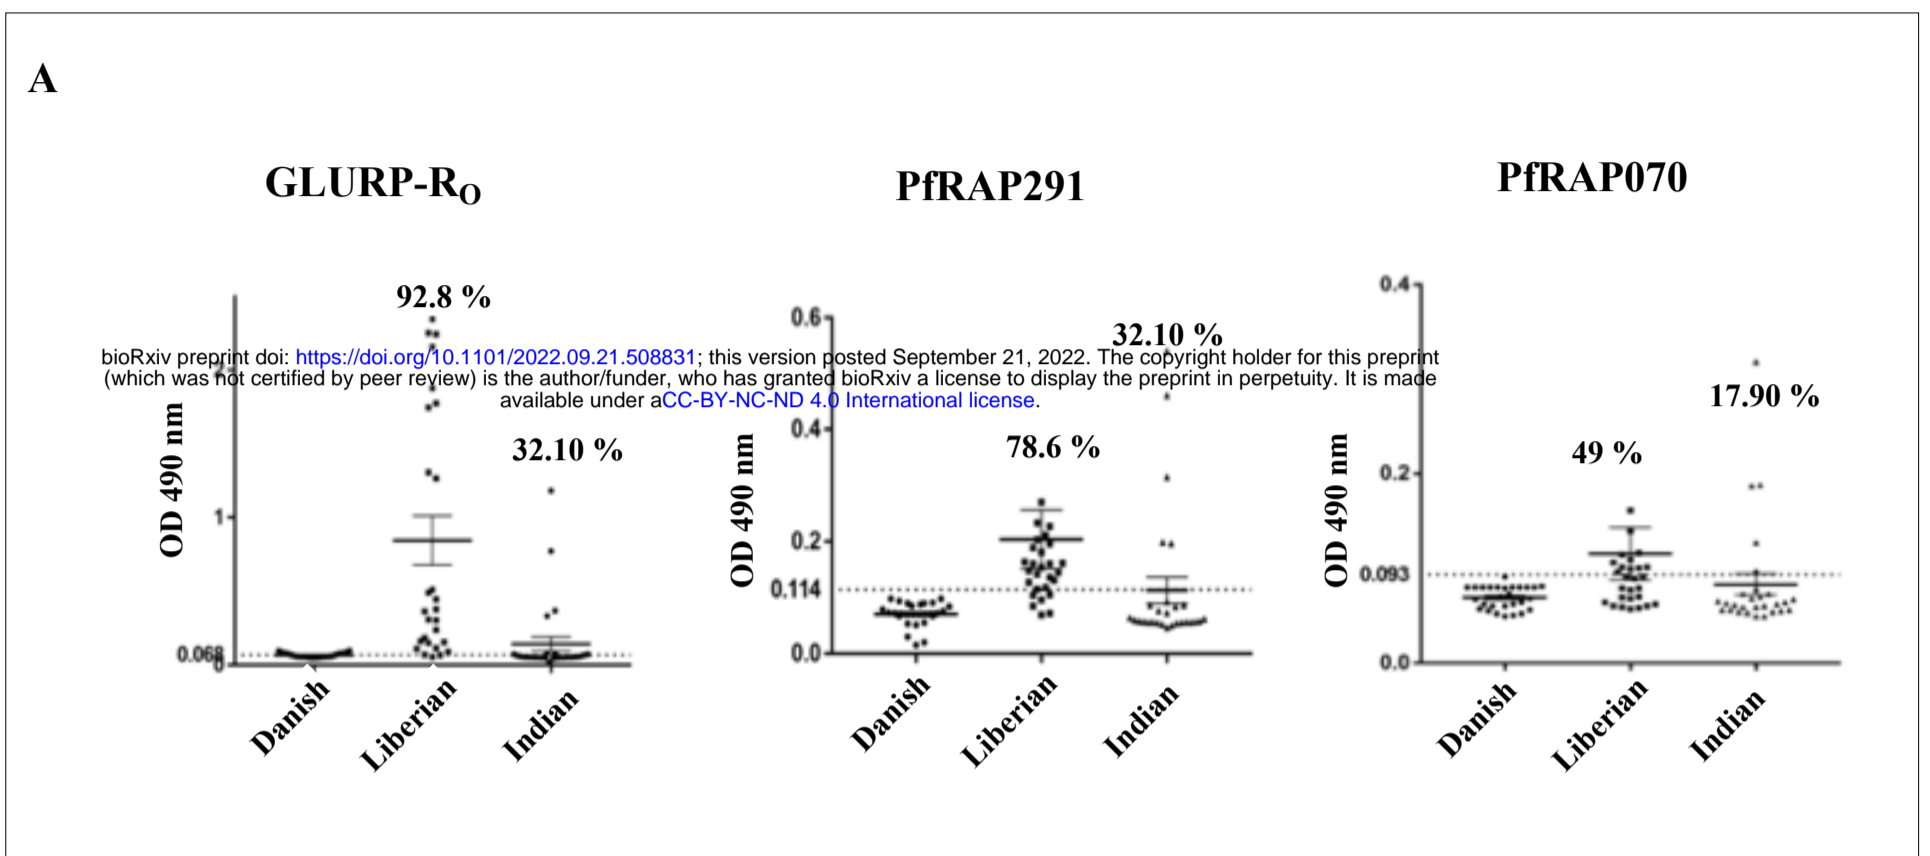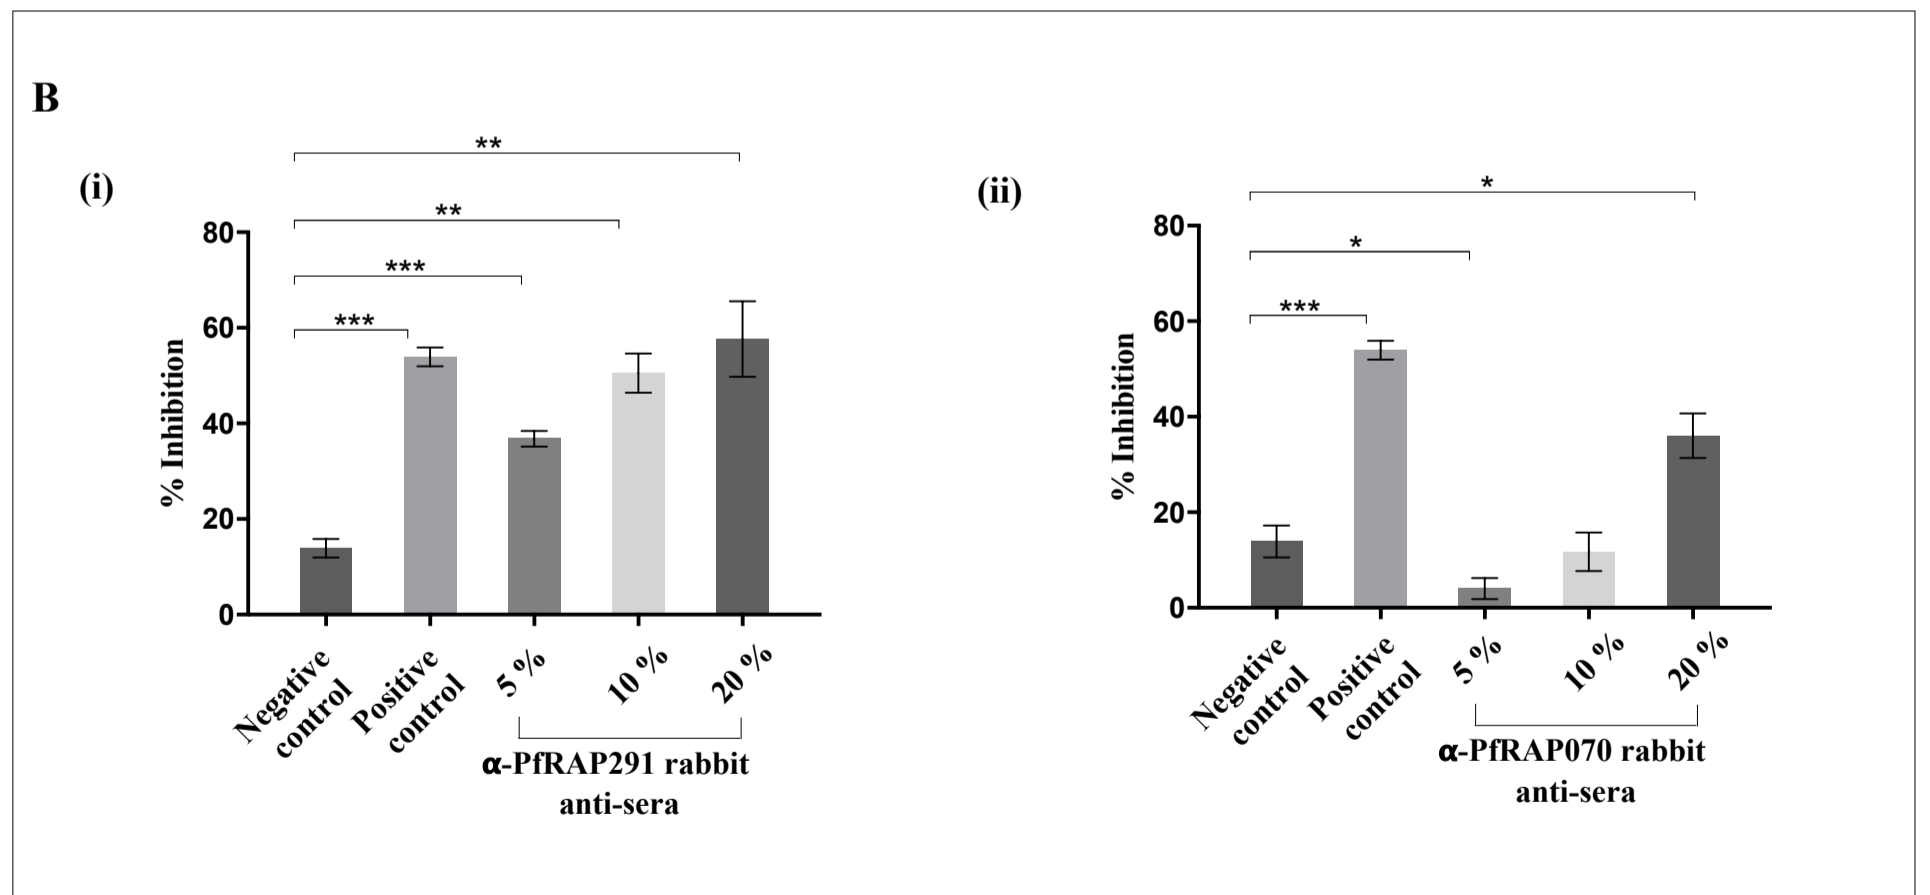

Source: https://www.biorxiv.org/content/10.1101/2022.09.21.508831v1.full.pdf
